# Supplementary material
Source: HighWire-hosted journal article supplement (http://www.qdcxjkg.com/highwire/filestream/113901/field_highwire_adjunct_files/2/Final_Handbook.pdf)
Supplement: Final_Handbook.pdf [file Final_Handbook.pdf]

# **HANDBOOK OF PROCEDURES FOR SPECIFIC INHALATION CHALLENGE TESTING IN THE DIAGNOSIS OF OCCUPATIONAL ASTHMA**

**European Taskforce on SIC  
June 2013**

Compiled by Katri Suuronen, Hille Suojalehto and Paul Cullinan, on behalf of the ERS Task Force on Specific Inhalation Challenges with Occupational Agents

**(to be updated 2018)**

We gratefully acknowledge the expert input from Erika Aguado, Lygia Budnik, Julie Cannon, Danilo Cottica, Maria Jesus Cruz Carmona, Geneviève Evrand, Bernadette Fitzgerald, Marie Paule Gancarski, Manuela Garcia, Vickie Moore, Joan Ponton and Brigitte Sbinne to the production of this handbook.

## **INTRODUCTION**

This handbook is a product of a pan-European taskforce on specific inhalation challenge (SIC) testing in the diagnosis of occupational asthma. It was compiled from information provided by twelve specialist clinical centres under the direction of Katri Suuronen. Our purpose was to provide to others information on the techniques used in each centre for SIC with different occupational agents. The tables below include information on the form and nature of the active and control agents and on methods, quantities and duration of delivery; where appropriate 'comments' and references are provided.

The information here is not intended as a set of full 'recipes' but as a guide; the handbook should be read in concert with the full taskforce report (reference). Readers are reminded that the general safety requirements, contra-indications and precautions described in the full report should be strictly applied in order to minimise the risk of severe adverse events; that the duration and/or concentration of exposure to occupational agents should only be gradually increased under close monitoring of functional parameters; that the starting doses listed here are a guide only and should be adjusted in light of a particular patient's circumstances; and that a control challenge test with a 6-8 hour period of spirometric monitoring on a separate day is required for the interpretation of the SIC results. Further information can be obtained from any of the centres listed and contact details are provided (page 3).

## LIST OF TABLES

|                                                                                                                                    |           |
|------------------------------------------------------------------------------------------------------------------------------------|-----------|
| <b>CENTRES: abbreviations and contact details .....</b>                                                                            | <b>4</b>  |
| <b>HIGH MOLECULAR WEIGHT AGENTS .....</b>                                                                                          | <b>6</b>  |
| <b>Flours: wheat, rye, oats, barley, soy, buckwheat.....</b>                                                                       | <b>6</b>  |
| <b>Grains and animal feed .....</b>                                                                                                | <b>8</b>  |
| <b>Enzymes: amylases, lipases, proteases, cellulases, xylanases, enzyme mixtures etc.....</b>                                      | <b>11</b> |
| <b>Natural rubber latex (NRL): gloves.....</b>                                                                                     | <b>13</b> |
| <b>Wood dusts: obeche, teak, iroko, western red cedar, ebony; ash, beech, pine; also medium<br/>density fibreboard (MDF) .....</b> | <b>14</b> |
| <b>Animal derived proteins .....</b>                                                                                               | <b>16</b> |
| <b>Miscellaneous plant derived materials .....</b>                                                                                 | <b>19</b> |
| <b>LOW MOLECULAR WEIGHT AGENTS.....</b>                                                                                            | <b>23</b> |
| <b>Diisocyanates .....</b>                                                                                                         | <b>23</b> |
| <b>Other plastic chemicals: epoxy resins, acrylic resins, powder paints, acid anhydrides, etc. ....</b>                            | <b>29</b> |
| <b>Metals and metal salts: welding fumes, nickel, cobalt, chromium, platinum, etc. ....</b>                                        | <b>37</b> |
| <b>Other chemicals in metal and electronics industry: metalworking fluids (MWF), soldering fluxes,<br/>etc. ....</b>               | <b>45</b> |
| <b>Hairdressing chemicals .....</b>                                                                                                | <b>49</b> |
| <b>Antimicrobials, disinfectants and detergents .....</b>                                                                          | <b>52</b> |
| <b>Pharmaceutical agents etc.....</b>                                                                                              | <b>56</b> |

## List of abbreviations:

|       |                                           |
|-------|-------------------------------------------|
| EA    | Ethanolamines                             |
| HDI   | Hexamethylene diisocyanate                |
| HMW   | High molecular weight                     |
| IPDI  | Isophorone diisocyanate                   |
| LMW   | Low molecular weight                      |
| MDF   | Medium density fibreboard                 |
| MDI   | Methylenediphenyl diisocyanate            |
| MIG   | Metal inert gas                           |
| MMA   | Methylmethacrylate                        |
| MWF   | Metalworking fluid                        |
| NA    | Data not available                        |
| NCO   | Reactive isocyanate group ( $-N=C=O$ )    |
| NDI   | 1,5-naphthalene diisocyanate              |
| NM    | Not measured                              |
| NRL   | Natural rubber latex                      |
| NSBHR | Nonspecific bronchial hyperresponsiveness |
| OEL   | Occupational exposure limit               |
| PBS   | Phosphate buffered saline                 |
| PE    | Polyethylene                              |
| PM    | Particle measurement                      |
| pMMA  | Polymethylmethacrylate                    |
| PP    | Polypropylene                             |
| ppb   | Parts per billion                         |
| PVC   | Polyvinyl chloride                        |
| RT    | Room temperature                          |
| SIC   | Specific inhalation challenge             |
| TDI   | Toluene diisocyanate                      |
| TGIC  | Triglycidyl isocyanurate                  |
| TIG   | Tungsten inert gas                        |
| TLV   | Threshold limit value                     |
| TPU   | Thermoplastic urethane                    |
| VOC   | Volatile organic compounds                |

## CENTRES: abbreviations and contact details

| Abbreviation | Centre                                                                                                                                         | Contact person: name and email                                                                                                                                                                                     |
|--------------|------------------------------------------------------------------------------------------------------------------------------------------------|--------------------------------------------------------------------------------------------------------------------------------------------------------------------------------------------------------------------|
| BHH          | Birmingham Heartlands Hospital, Occupational Lung Disease Unit, Birmingham, UK                                                                 | Vicky Moore<br><a href="mailto:vicky.c.moore@heartofengland.nhs.uk">vicky.c.moore@heartofengland.nhs.uk</a>                                                                                                        |
| CHUM         | Department of Chest Medicine, Centre Hospitalier Universitaire de Mont-Godinne; Université Catholique de Louvain, Yvoir, Belgium               | Olivier Vandenplas<br><a href="mailto:olivier.vandenplas@uclouvain.be">olivier.vandenplas@uclouvain.be</a><br>Geneviève Evrand<br><a href="mailto:Geneviève.evrard@uclouvain.be">Geneviève.evrard@uclouvain.be</a> |
| CIOM/ IOMM   | Institute for Occupational Medicine, Charité University, Berlin, Germany<br>Institute for Occupational and Maritime Medicine, Hamburg, Germany | Xaver Baur <a href="mailto:xaver.baur@charite.de">xaver.baur@charite.de</a><br>Lygia Therese Budnik <a href="mailto:L.Budnik@uke.de">L.Budnik@uke.de</a>                                                           |
| FIOH         | Occupational Medicine Team, Finnish Institute of Occupational Health, Helsinki, Finland                                                        | Katri Suuronen<br><a href="mailto:katri.suuronen@ttl.fi">katri.suuronen@ttl.fi</a>                                                                                                                                 |
| FJDM         | Allergy Department, Fundacion Jimenez Diaz-Capio, CIBER de Enfermedades Respiratorias (CIBERES), Madrid, Spain                                 | Dominguez Joaquin Sastre<br><a href="mailto:JSastre@fjd.es">JSastre@fjd.es</a>                                                                                                                                     |
| FSM          | Allergology and Immunology Unit, Fondazione Salvatore Maugeri, Institute of Care and Research, Scientific Institute of Pavia, Pavia, Italy     | Gianna Moscato<br><a href="mailto:gianna.moscato@fsm.it">gianna.moscato@fsm.it</a>                                                                                                                                 |
| SUH          | Division of Asthma and Allergy, Department of Chest Diseases, Strasbourg University Hospital, Strasbourg, France                               | Frédéric de Blay<br><a href="mailto:Frederic.DEBLAY@chru-strasbourg.fr">Frederic.DEBLAY@chru-strasbourg.fr</a>                                                                                                     |
| NIOM         | Nofer Institute of Occupational Medicine, Department of Occupational Diseases&Clinical Toxicology, Lodz, Poland                                | Jolanta Walusiak-Skorupa<br><a href="mailto:jolantaw@imp.lodz.pl">jolantaw@imp.lodz.pl</a>                                                                                                                         |
| NMGH         | Department of Respiratory Medicine North Manchester General Hospital, Manchester, United Kingdom                                               | Jennifer Hoyle<br><a href="mailto:Jennifer.hoyle@pat.nhs.uk">Jennifer.hoyle@pat.nhs.uk</a>                                                                                                                         |
| RBHT         | Department of Occupational and Environmental Medicine, Imperial College, National Heart and Lung Institute, London, United Kingdom             | Julie Cannon<br><a href="mailto:j.cannon@rbht.nhs.uk">j.cannon@rbht.nhs.uk</a>                                                                                                                                     |
| UNIPD        | Department of Cardiologic, Thoracic, and Vascular Sciences,                                                                                    | Piero Maestrelli                                                                                                                                                                                                   |

|      |                                                               |                                                                            |
|------|---------------------------------------------------------------|----------------------------------------------------------------------------|
|      | University of Padova, Padova, Italy                           | <a href="mailto:piero.maestrelli@unipd.it">piero.maestrelli@unipd.it</a>   |
| VHIR | Institut de Recerce, Hospital Vall d'Hebron, Barcelona, Spain | Xavier Muñoz<br><a href="mailto:xmunoz@vhebron.net">xmunoz@vhebron.net</a> |

## HIGH MOLECULAR WEIGHT AGENTS

**Flours: wheat, rye, oats, barley, soy, buckwheat**

**Notes:**

- most centres use a dust-tipping method but nebulisation is an alternative
- particle size and/or particle mass may be measured during active challenges
- flours from the workplace are preferred, because shop-bought flours may lack relevant allergens

| Physical form             | Control agent                               | Method of delivery                                                               | Approximate amount used                 | Duration                                                | Comments                                                                                                                                   | Centre |
|---------------------------|---------------------------------------------|----------------------------------------------------------------------------------|-----------------------------------------|---------------------------------------------------------|--------------------------------------------------------------------------------------------------------------------------------------------|--------|
| Dust tipping              |                                             |                                                                                  |                                         |                                                         |                                                                                                                                            |        |
| Powder                    | Lactose powder (dusting with pressured air) | Dusting with pressured air (1 blow/minute)                                       | 100-300 g as such or diluted in lactose | 30 –60 min                                              | If IgE sensitization is strong, dilution to 10-50% in lactose in the first challenge                                                       | FIOH   |
| Powder                    | Lactose or starch powder                    | Tipping and dusting 30 centimetres away from patient's face                      | ~500- 1000 g                            | Up to 60 min (1, 15, 30, 60 min)                        |                                                                                                                                            | NIOM   |
| Powder diluted in lactose | Lactose powder                              | Dust tipping from one tray to another 30 centimetres away from the patients face | 10 - 100 g diluted in 150g of lactose   | Exposure gradually increasing up to a maximum of 60 min | The quantity of flour mixed with lactose depends on clinical criteria according to patient sensitization and respiratory functional status | VHIR   |
| Powder                    | Lactose                                     | Tipping and dusting with pressured air                                           | 500 g flour used at work                | Up to 120 min (1, 4, 10, 15, 30, 60 min)                |                                                                                                                                            | CHUM   |

| Physical form                   | Control agent                    | Method of delivery                                                              | Approximate amount used       | Duration                                         | Comments                                                                                                                        | Centre        |
|---------------------------------|----------------------------------|---------------------------------------------------------------------------------|-------------------------------|--------------------------------------------------|---------------------------------------------------------------------------------------------------------------------------------|---------------|
| Powder                          | Lactose powder                   | Dust tipping                                                                    | Up to 1kg                     | Up to 70 min (10+20+40)                          |                                                                                                                                 | BHH           |
| Powder                          | Lactose powder, sieved and baked | Mixing with lactose powder, then tipping repeatedly by patient                  | 1% to 10% in 250 g lactose    | 20 min                                           |                                                                                                                                 | RBHT          |
| Powder                          | Lactose or tapioca flour         | Tipping from one tray to another                                                | ~500 g                        | Up to 30 min                                     |                                                                                                                                 | IOMM/<br>CIOM |
| Powder                          | Lactose powder                   | Tipping and dusting with pressured air                                          | 100-300 g as such             | Up to 120 min (1, 4, 10, 15, 30, 60 min)         |                                                                                                                                 | FSM           |
| Powder                          | Lactose powder                   | Tipping from a small vase through a sieve 30 cm from the patient                | 250-500 g                     | Up to 60 min, starting with 1,2,5,10,15,30, etc. | Starting with weak mixture in suspicion of strong sensitization based on clinical history and IgE                               | NMGH          |
| Powder                          | Lactose                          | Close-circuit delivery machine                                                  |                               | Up to 30 min                                     |                                                                                                                                 | FJDM          |
| <b>Nebulisation</b>             |                                  |                                                                                 |                               |                                                  |                                                                                                                                 |               |
| Homemade /commercial extracts   | Saline                           | Nebulisation by tidal volume method with home-made extracts/commercial extracts |                               | 2 min each concentration                         |                                                                                                                                 | FJDM          |
| Commercially available extracts | Saline diluent                   | Nebulisation in increasing concentrations                                       | Commercial standardized conc. | 2 min each concentration                         | In case of strong sensitization or strong NSBHR initial dilution is 1/10,000 or higher; stepwise increase: 1/1,000, 1/100, 1/10 | IOMM/<br>CIOM |



## Grains and animal feed

### Notes:

- seeds or large particles may be ground smaller prior to SIC
- particle size and/or particle mass may be measured
- dust tipping or nebulisation methods may be used

| Physical form                                             | Control agent   | Method of delivery                                           | Approximate amount used                                 | Duration                     | Comments and references                                                                  | Centre |
|-----------------------------------------------------------|-----------------|--------------------------------------------------------------|---------------------------------------------------------|------------------------------|------------------------------------------------------------------------------------------|--------|
| <b><i>Wheat, rye, oats, barley and their mixtures</i></b> |                 |                                                              |                                                         |                              |                                                                                          |        |
| Powder, rough particles, pellets, etc.                    | Lactose powder  | Dust tipping or dusting with pressurised air (1 blow/minute) | 100-300 g as such or diluted in lactose                 | 30 –60 min                   | If IgE sensitization is strong, dilution to 10-50% in lactose in the first challenge     | FIOH   |
| Powder, rough particles, etc.                             | Lactose powder  | Dust tipping                                                 | ~500- 1000 g                                            | 30 –60 min                   |                                                                                          | NIOM   |
| Powder, rough particles, etc.                             | Lactose powder  | Dust tipping                                                 | 100-300 g as such                                       | 1, 4, 10, 15, 30, 60, 120min |                                                                                          | FSM    |
| Liquid home-made extracts                                 | Saline          | Nebulisation (tidal volume method)                           | Starting concentration based on skin endpoint titration | 2 min each concentration     | Starting concentration by end-point skin titration (Vereda et al. Allergy 2007;62:211-2) | FJDM   |
| <b><i>Soy hull</i></b>                                    |                 |                                                              |                                                         |                              |                                                                                          |        |
| Powder diluted in                                         | Lactose powder, | Dust tipping                                                 | 1% in 250 g lactose                                     | Exposure gradually           |                                                                                          | RBHT   |

| Physical form                                  | Control agent    | Method of delivery                 | Approximate amount used                                                                                       | Duration                             | Comments and references                                                                                                                                                                                                                                                           | Centre |
|------------------------------------------------|------------------|------------------------------------|---------------------------------------------------------------------------------------------------------------|--------------------------------------|-----------------------------------------------------------------------------------------------------------------------------------------------------------------------------------------------------------------------------------------------------------------------------------|--------|
| lactose                                        | sieved and baked |                                    |                                                                                                               | increasing up to a maximum of 20 min |                                                                                                                                                                                                                                                                                   |        |
| Liquid home-made extracts                      | Saline           | Nebulisation using a dosimeter     | Increasing concentrations from 1:1000; 1:100; 1:10; 1:1 and no of inhalations up to 40                        | 2 min each concentration.            | Starting concentration by end-point skin titration                                                                                                                                                                                                                                | FSM    |
| Liquid in-house antigen extract                | Saline           | Nebulisation using a nebulizer     | 2 ml of each concentration, the starting conc. being based on metacholine PC20 and skin prick test reactivity | -                                    | -Antigen extract made according to Gomez-Olles S et al. Clin Exp Allergy 2006; 36: 1176-83<br>-The starting conc. is calculated from methacholine PC20 and the smallest antigen conc provoking a positive skin response (Cockcroft DW, et al. Am Rev Respir Dis 1987;135:264-267) | VHIR   |
| <b>Other</b>                                   |                  |                                    |                                                                                                               |                                      |                                                                                                                                                                                                                                                                                   |        |
| Liquid lima Bean ( <i>P. lunatus</i> ) extract | Saline           | Nebulisation using a dosimeter     | Dilution 1:100                                                                                                | 1, 4, 10, 15, 30, 60 min             | Tonini S et al. Letters/Ann Allergy Asthma Immunol 2012;108:60-67                                                                                                                                                                                                                 | FSM    |
| Mushroom spores, liquid homemade extracts      | Saline           | Nebulisation using a dosimeter     | Increasing concentrations from 1:1000; 1:100; 1:10; 1:1 and n° of inhalations up to 40                        | 2 min each concentration.            | Starting concentration by end-point skin titration                                                                                                                                                                                                                                | FSM    |
| Mushroom spores, liquid homemade               | Saline           | Nebulisation (tidal volume method) | Starting concentration based on skin endpoint titration                                                       | 2 min each concentration             | Vereda et al. Allergy 2007;62:211-2                                                                                                                                                                                                                                               | FJDM   |

| <b>Physical form</b> | <b>Control agent</b> | <b>Method of delivery</b> | <b>Approximate amount used</b> | <b>Duration</b> | <b>Comments and references</b> | <b>Centre</b> |
|----------------------|----------------------|---------------------------|--------------------------------|-----------------|--------------------------------|---------------|
| extracts             |                      |                           |                                |                 |                                |               |

**Enzymes: amylases, lipases, proteases, cellulases, xylanases, enzyme mixtures etc.**

**Notes:**

- enzymes are potent allergens and testing should be started with a low concentration
- while most centres use a dust-tipping method, some use nebulisation

| Physical form             | Control agent                   | Method of delivery                                                          | Approximate amount used                                                   | Duration                                                                                       | Comments                                                                   | Centre        |
|---------------------------|---------------------------------|-----------------------------------------------------------------------------|---------------------------------------------------------------------------|------------------------------------------------------------------------------------------------|----------------------------------------------------------------------------|---------------|
| Dust tipping              |                                 |                                                                             |                                                                           |                                                                                                |                                                                            |               |
| Powder diluted in lactose | Lactose powder                  | Dusting                                                                     | 0.03 - 3% enzyme in 100 g lactose                                         | 30 min                                                                                         | Usually started with the lowest concentration (0.03%).                     | FIOH          |
| Powder                    | Lactose powder sieved and baked | Enzyme dust added to 250g lactose powder, then tipped repeatedly by patient | 0.1% to 2.5% in lactose                                                   | 20 min                                                                                         | Can be extremely potent at small doses                                     | RBHT          |
| Powder diluted in lactose | Lactose powder                  | Dusting                                                                     | Increasing dilutions in 100 g lactose (1/1.000, 1/100, 1/10, pure powder) | 1, 4, and 10 min for each dilution, then pure powder up to 120 min ((1, 4, 10, 15, 30, 60 min) | Starting dilution determined by end-point skin titration                   | CHUM          |
| Powder                    | Lactose                         | Close-circuit delivery machine                                              |                                                                           | Up to 30 min                                                                                   |                                                                            | FJDM          |
| Nebulisation              |                                 |                                                                             |                                                                           |                                                                                                |                                                                            |               |
| Liquid, diluted in saline | Saline                          | Nebulisation in increasing concentrations                                   | 1 ml of each concentration                                                | 2 min of each concentration                                                                    | Starting concentration is usually from 0.00001 mg/ml; stepwise increase to | IOMM/<br>CIOM |

| Physical form     | Control agent | Method of delivery                                | Approximate amount used | Duration            | Comments                                                                     | Centre |
|-------------------|---------------|---------------------------------------------------|-------------------------|---------------------|------------------------------------------------------------------------------|--------|
|                   |               |                                                   |                         |                     | 0.1 mg/ml;<br>depending on the<br>level of IgE<br>sensitization and<br>NSBHR |        |
| Homemade extracts | Saline        | Nebulisation Tidal volume<br>method with extracts |                         | 2 min each dilution | Starting<br>concentration by<br>end-point skin<br>titration                  | FJDM   |

## Natural rubber latex (NRL): gloves

### Notes:

- most centres use whole, powdered latex gloves but nebulisation of a commercial extract is an alternative

| Physical form          | Control agent         | Method of delivery                        | Approximate amount used    | Duration                                 | Comments and references                                                                                                                                                                                         | Centre        |
|------------------------|-----------------------|-------------------------------------------|----------------------------|------------------------------------------|-----------------------------------------------------------------------------------------------------------------------------------------------------------------------------------------------------------------|---------------|
| Powdered latex gloves  |                       |                                           |                            |                                          |                                                                                                                                                                                                                 |               |
| Powdered NRL gloves    | PVC gloves            | Handling gloves                           | 6-10 gloves                | 30 min                                   | Number of gloves depends on the level of IgE sensitization                                                                                                                                                      | FIOH          |
| Powdered NRL gloves    | PVC gloves            | Handling and shaking gloves               | 2 gloves per 5 min         | 1, 4, 10, 15, 30, 60, 120 min            |                                                                                                                                                                                                                 | NIOM          |
| Powdered NRL gloves    | PVC or nitrile gloves | Handling gloves                           | Up to 15 gloves            | Up to 70 min                             |                                                                                                                                                                                                                 | BHH           |
| Powdered NRL gloves    | PVC gloves            | Handling gloves                           | 10 gloves                  | 20 min                                   |                                                                                                                                                                                                                 | RBHT          |
| Powdered NRL gloves    | PVC gloves            | Handling gloves                           | 1-10 gloves                | Up to 30 min                             | Number of gloves depends on the level of IgE sensitization and NSBHR                                                                                                                                            | IOMM/<br>CIOM |
| Powdered NRL gloves    | PVC gloves            | Handling and shaking gloves               | 2 gloves per 5 min         | Up to 120 min (1, 4, 10, 15, 30, 60 min) | Vandenplas O. Occupational asthma caused by natural rubber latex. Eur Respir J. 1995;8:1957-65.                                                                                                                 | CHUM          |
| Powdered NRL gloves    | PVC or nitrile gloves | Handling gloves                           | 6 – 15 gloves              | 30 -60 min                               | Number of gloves depends on the level of IgE sensitization                                                                                                                                                      | FSM           |
| Nebulisation           |                       |                                           |                            |                                          |                                                                                                                                                                                                                 |               |
| Commercial NRL extract | Saline                | Administered by aerosol using a nebuliser | 2 ml of each concentration |                                          | The starting concentration is calculated from methacholine PC <sub>20</sub> and the smallest antigen concentration provoking a positive skin response (Cockcroft DW, et al. Am Rev Respir Dis 1987;135:264-267) | VHIR          |

**Wood dusts: obeche, teak, iroko, western red cedar, ebony; ash, beech, pine; also medium density fibreboard (MDF)**

**Notes:**

- some woods contain HMW (protein) allergens, while in some materials (Western red cedar, MDF) the suspected agent is a LMW compound
- almost all centres use a form of dust-tipping

| Physical form                                 | Control agent            | Method of delivery                             | Approximate amount used              | Duration                                    | Comments and references                                                                                                                                                                                   | Centre |
|-----------------------------------------------|--------------------------|------------------------------------------------|--------------------------------------|---------------------------------------------|-----------------------------------------------------------------------------------------------------------------------------------------------------------------------------------------------------------|--------|
| Dust tipping                                  |                          |                                                |                                      |                                             |                                                                                                                                                                                                           |        |
| Neat wood dust                                | Lactose or starch powder | Dust tipping                                   | 500- 1000 g                          | Up to 60 min                                |                                                                                                                                                                                                           | NIOM   |
| Neat wood dust/shavings or diluted in lactose | Lactose powder           | Dust tipping                                   | 10 - 100g diluted in 150g of lactose | Gradually increasing to a maximum of 60 min | The quantity of dust mixed with lactose depends on clinical criteria according to patient sensitisation and respiratory functional status (Munoz X et al. Scand J Work Environ Health 2007;33(2):153–158) | VHIR   |
| Neat wood dust                                | lactose powder           | Dust tipping                                   | 100g                                 | 30 min                                      |                                                                                                                                                                                                           | FJDM   |
| Neat wood dust                                | Lactose powder           | Sanding piece of wood using an electric sander |                                      | 1, 4, 10, 15, 30, 60, 120 min               | Malo JL, Cartier A, Desjardins A, Van de Weyer R, Vandenplas O. Occupational asthma caused by oak wood dust. Chest. 1995;108:856-8.                                                                       | CHUM   |
| Neat wood dust                                | Pine                     | Sanding piece of wood using an electric sander |                                      | 5 – 20 min                                  |                                                                                                                                                                                                           | RBHT   |
| Neat wood dust                                | Pine or spruce wood      | Manual or electrical sanding                   |                                      | 1, 4, 10, 15, 30, 60, 120 min               |                                                                                                                                                                                                           | UNIPD  |
| Neat wood dust                                | Pine                     | Sanding piece of wood using an                 |                                      | Up to 60 min                                |                                                                                                                                                                                                           | NIOM   |

| Physical form                        | Control agent                                                       | Method of delivery                                                          | Approximate amount used           | Duration                                | Comments and references                                                                                     | Centre |
|--------------------------------------|---------------------------------------------------------------------|-----------------------------------------------------------------------------|-----------------------------------|-----------------------------------------|-------------------------------------------------------------------------------------------------------------|--------|
|                                      |                                                                     | electric sander                                                             |                                   |                                         |                                                                                                             |        |
| Neat wood dust                       | Lactose powder                                                      | Sanding piece of wood using an electric sander or Dust tipping              |                                   | 5 – 20 min                              |                                                                                                             | FSM    |
| Neat wood dust or diluted in lactose | Lactose powder                                                      | Dusting with pressurised air (1 blow/minute)                                | 10-50% wood dust in ~100g lactose | 30 min                                  | Dilution in lactose in the 1 <sup>st</sup> SIC; the 2 <sup>nd</sup> SIC possibly with 100% wood dust        | FIOH   |
| 1) Solid wood sanded<br>2) Powder    | Another wood species (sanded or powder depending on the active SIC) | 1) Sanding the wood, electric sander<br>2) Tipping from one tray to another | 1) wood block<br>2) 250-500g      | Gradually increasing up to total 60 min | The method depends on the mode of usage at work                                                             | NMHG   |
| MDF                                  | Pine                                                                | Sanding piece of MDF using an electric sander                               |                                   | 5 – 20 min                              | Burton C et al. Medium density fibreboard and occupational asthma. A case series. Occup Med 2011;61:357-364 | RBHT   |
| MDF dust                             | Formaldehyde painted on to cardboard                                | Sanding with electric or hand sander                                        |                                   | Up to 60 min                            |                                                                                                             | BHH    |
| <b>Nebulisation</b>                  |                                                                     |                                                                             |                                   |                                         |                                                                                                             |        |
| Home-made extracts                   | Saline                                                              | Nebulisation (tidal volume method) with home-made extracts                  |                                   | 2 min each dilution                     |                                                                                                             | FJDM   |



## Animal derived proteins

### Notes:

- a variety of methods are used: dust-tipping, mimicking work tasks, nebulisation of commercial or home-made extracts, quasi-controlled workplace challenges

| Active agent                                                                                      | Physical form                     | Control agent                                          | Method of delivery                                                                               | Approximate amount used           | Duration                         | Comments and references                                                | Centre |
|---------------------------------------------------------------------------------------------------|-----------------------------------|--------------------------------------------------------|--------------------------------------------------------------------------------------------------|-----------------------------------|----------------------------------|------------------------------------------------------------------------|--------|
| <b><i>Animal epithelium and urine (cow, pig, mouse, rat, rabbit, mites, fur animals etc.)</i></b> |                                   |                                                        |                                                                                                  |                                   |                                  |                                                                        |        |
| Mouse and rat epithelium and urine                                                                | Animal beddings (flakes + powder) | Lactose powder or unused beddings (dusting or tipping) | Tipping used animal beddings containing fresh urine and epithelium beddings from vase to another | 500-1000 ml                       | 30-45 min                        |                                                                        | FIOH   |
| Rat, mouse epithelium an urine                                                                    | Animal beddings                   | Unused beddings                                        | Beddings containing fresh urine and epithelium                                                   | Approx. 500g                      | 1-60 min                         |                                                                        | SUH    |
| Laboratory animals (mice)                                                                         | Live animals as such              | Unused beddings                                        | Patient undergoing prolonged exposure inside the animal facilities                               | Approximately 100 mice are housed | 30 and 60 min on successive days | Munoz X et al. Respiration 2007;74(4):467-470                          | VHIR   |
| Live laboratory mice                                                                              | Live animals in cage with bedding | Monitoring patient over 1 day without animal exposure  | Handling the animals, cleaning them out as in normal working day                                 |                                   | 10 – 30 min                      | This is done in the animal research facility, not in the challenge lab | RBHT   |
| Furs (blue fox, mink, etc.)                                                                       | As such                           | Lactose powder or                                      | Handling (dusting, brushing etc) of furs                                                         | 3-7 furs                          | 30-45 min                        |                                                                        | FIOH   |
| Fur animals and feathers,                                                                         | As such                           | Lactose powder or starch powder                        | Handling (dusting, brushing, pulling,                                                            | 3-5 furs                          | Up to 60 min                     |                                                                        | NIOM   |

| Active agent                                                          | Physical form | Control agent               | Method of delivery                       | Approximate amount used                                                                | Duration                 | Comments and references                                                                                                                                                      | Centre |
|-----------------------------------------------------------------------|---------------|-----------------------------|------------------------------------------|----------------------------------------------------------------------------------------|--------------------------|------------------------------------------------------------------------------------------------------------------------------------------------------------------------------|--------|
| etc.                                                                  |               |                             | tousling etc.) of furs                   |                                                                                        |                          |                                                                                                                                                                              |        |
| Homemade or commercial allergen extracts of hair, dander, mites, etc. | Liquid        | Saline                      | Nebulisation of with tidal volume method |                                                                                        | 2 min each dilution      | Starting concentration by end-point skin titration                                                                                                                           | FJDM   |
| Commercial allergen extracts of cow or dog danders                    | Liquid        | Saline                      | Through dosimeter                        | Increasing concentrations from 1:1000; 1:100; 1:10; 1:1 and n° of inhalations up to 40 | 2 min each concentration |                                                                                                                                                                              | FSM    |
| Commercial extract of sheep wool                                      | Liquid        | Saline                      | Through dosimeter                        | Increasing concentrations from 1:1000; 1:100; 1:10; 1:1 and n° of inhalations up to 40 | 2 min each concentration |                                                                                                                                                                              | FSM    |
| Commercial allergen extracts of cow epithelium, storage mites, etc.   | Liquid        | Commercial allergen diluent | Spira Elektro 2 dosimeter                | 1-20 breaths                                                                           | 15-60 min                | -Allergen dilution 5-50 BU/ml or 10 000-100 w/w<br>-Stepwise increase in the number of inhalations, depending on the level of IgE sensitization and symptoms during the test | FIOH   |

| Active agent | Physical form | Control agent                               | Method of delivery                                                              | Approximate amount used        | Duration         | Comments and references                                                                                                                                                                                                                                | Centre |
|--------------|---------------|---------------------------------------------|---------------------------------------------------------------------------------|--------------------------------|------------------|--------------------------------------------------------------------------------------------------------------------------------------------------------------------------------------------------------------------------------------------------------|--------|
|              |               |                                             |                                                                                 |                                |                  |                                                                                                                                                                                                                                                        |        |
| <b>Other</b> |               |                                             |                                                                                 |                                |                  |                                                                                                                                                                                                                                                        |        |
| Fish         | Solid         | Other fish with negative IgE                | Mimicking the patients job                                                      |                                | Up to 60–120 min |                                                                                                                                                                                                                                                        | FJDM   |
| Carmine      | Powder        | Lactose powder or in-house control solution | Dusting or mixing or pouring carmine diluted in lactose from a vase to another  | ~100 g lactose/carmine mixture | 15–30 minutes    | - carmine colour derived from cochineal insect<br>- if IgE sensitization is strong, dilution to 10-50% in lactose is done                                                                                                                              | FIOH   |
| Carmine      | Liquid        | Saline                                      | Nebulizing solutions with increasing concentrations of carmine with a nebulizer | 2 ml of each concentration     |                  | - method: Cockcroft DW, et al. Am Rev Respir Dis 1987;135:264-267<br>- protein concentration of carmine determined by the BCA protein assay<br>-The starting concentration is based on metacholine PC <sub>20</sub> and the skin prick test reactivity | VHIR   |

## Miscellaneous plant derived materials

### Notes:

- a wide variety of methods are used: tipping, dusting, work mimicking, nebulisation of home-made extracts, etc
- processing the material (e.g. boiling) may affect the allergenicity of the proteins

| Active agent                                   | Physical form    | Control agent                                            | Method of delivery                                                                       | Approximate amount used      | Duration     | Comments and references                                                           | Centre |
|------------------------------------------------|------------------|----------------------------------------------------------|------------------------------------------------------------------------------------------|------------------------------|--------------|-----------------------------------------------------------------------------------|--------|
| <b><i>Decorative plants and vegetables</i></b> |                  |                                                          |                                                                                          |                              |              |                                                                                   |        |
| Fresh plants/vegetables                        | Solid            | Cutting lettuce or in-house control solution (nebulised) | Handling (cutting, ripping, turning) plants                                              | e.g. 3-15 decorative flowers | 30 min       |                                                                                   | FIOH   |
| Fresh plants/vegetables                        | Solid            | Saline control solution or cutting lettuce               | Handling plants (cutting, ripping, turning)                                              | 3-15 decorative flowers      | Up to 60 min |                                                                                   | NIOM   |
| Fresh vegetables                               | Solid            | Saline                                                   | Boil fresh vegetable in pot in a chamber                                                 | 3-5 fresh vegetables         | Up to 60 min |                                                                                   | NIOM   |
| Fresh vegetables                               | Solid            | Saline                                                   | Boil fresh vegetable in glass jar into a chamber                                         |                              | Up to 60 min | - Quirce et al. Allergy 2005; 60: 969-970<br>- blinding is difficult due to odour | FJDM   |
| <b><i>Foodstuffs and spices</i></b>            |                  |                                                          |                                                                                          |                              |              |                                                                                   |        |
| Spices                                         | Powder or flakes | Lactose powder (dusting with pressured air)              | Dusting powder or flakes mixed in lactose with pressured air or handling (1 blow/minute) | ~100 g lactose mixture       | 30 min       | Cardamom, pepper, oregano, coriander, etc.                                        | FIOH   |
| Spices                                         | Powder           | Lactose powder                                           |                                                                                          | ~100-500 g                   |              | Pepper,                                                                           | NIOM   |

| Active agent                                   | Physical form | Control agent                               | Method of delivery                                             | Approximate amount used                                 | Duration                                               | Comments and references                              | Centre    |
|------------------------------------------------|---------------|---------------------------------------------|----------------------------------------------------------------|---------------------------------------------------------|--------------------------------------------------------|------------------------------------------------------|-----------|
|                                                | or flakes     |                                             |                                                                | spice mixture                                           | 30 min                                                 | oregano, basil, cardamon etc.                        |           |
| Spices, homemade extracts                      | Liquid        | Saline                                      | Nebulisation by tidal volume method with home-made extracts    |                                                         | 2 min each dilution, starting with end-point titration | Starting concentration by end-point skin titration   | FJDM      |
| Spices                                         | Liquid        | Saline                                      | Nebulisation by tidal volume method with home-made extracts    |                                                         | 2 min each dilution                                    | Starting concentration by end-point skin titration   | CHUM      |
| Food additives: gum arabicum, carob tree, etc. | Powder        | Lactose powder (dusting with pressured air) | Dusting with pressured air (1 blow/minute)                     | ~100 g lactose/additive mixture                         | 30 min                                                 | Dilution to 10-50% in lactose in the first challenge | FIOH      |
| Raw coffee                                     | Powder        | Lactose powder                              | Dusting with pressured air (1 blow/minute)                     | ~100 g lactose/coffee mixture                           | 30 min                                                 | Dilution to 10-50% in the first challenge            | FIOH      |
| Raw coffee                                     | Powder        | Lactose or tapioca flour                    | Shaking the beans                                              | c. 500 g                                                | Up to 30 min                                           |                                                      | IOMM/CIOM |
| Raw coffee                                     | Powder        | Lactose powder                              | Dusting tipping                                                | 100 g coffee                                            | 30 min up to 2 h                                       |                                                      | FSM       |
| Raw coffee (green coffee bean)                 | Liquid        | Saline                                      | Handling                                                       | Increasing concentrations from 1:1000; 1:100; 1:10; 1:1 | 30 min up to 2 h                                       |                                                      | FSM       |
| Tea dust, herbal teas                          | Powder        | Lactose powder, sieved and baked            | % dust added to 250g lactose powder, then tipped repeatedly by | 1% to 10 %                                              | 20 min                                                 |                                                      | RBHT      |

| Active agent                                     | Physical form     | Control agent  | Method of delivery                                             | Approximate amount used                                                                | Duration                            | Comments and references                                  | Centre |
|--------------------------------------------------|-------------------|----------------|----------------------------------------------------------------|----------------------------------------------------------------------------------------|-------------------------------------|----------------------------------------------------------|--------|
|                                                  |                   |                | patient                                                        |                                                                                        |                                     |                                                          |        |
| Cacao (grained raw cacao beans)                  |                   | Lactose powder | Dust tipping                                                   | 100 g cacao                                                                            | 30 min up to 2 h                    |                                                          | FSM    |
| Mushroom spores                                  | Powder and pieces | Lactose powder | Tipping from one tray to another                               |                                                                                        | 10 – 15 – 30 – 60 min.<br>Up to 2 h |                                                          | FSM    |
| Mushroom spores, home-made extracts              | Liquid            | Saline         | Nebulisation using a dosimeter with home-made extracts         | Increasing concentrations from 1:1000; 1:100; 1:10; 1:1 and n° of inhalations up to 40 | 2 min each concentration.           | Starting concentration by end-point skin titration       | FSM    |
| Fungi on salami surface                          | Solid/ powder     | Lactose powder | Mimicking the patients job = brushing of the salami surface    |                                                                                        | 10 – 15 – 30 – 60 min.<br>Up to 2 h |                                                          | FSM    |
| <i>Ephestia kuehniella</i> (flour moth) in flour | Powder or flakes  | Lactose powder | Tipping from one tray to another                               |                                                                                        | 10 – 15 – 30 – 60 min.<br>Up to 2 h |                                                          | FSM    |
| <i>Plantago ovata</i>                            | Powder            | Lactose powder | Dust tipping from one tray to another 30 cm away from the face | 10 g diluted in 150g of lactose                                                        | 15 min                              | Munoz X et al. Ann Allergy Asthma Immunol 2006;96:494–6. | VHIR   |
| <b>Other</b>                                     |                   |                |                                                                |                                                                                        |                                     |                                                          |        |
| Black Henna                                      | Powder            | Lactose powder | Mimicking the patients job                                     | Diluted powder 1:10                                                                    | 10 – 15 – 30 – 60 min. Up to 2 h    | Scibilia E et al. Allergy                                | FSM    |

| Active agent                                                     | Physical form | Control agent                                 | Method of delivery | Approximate amount used               | Duration   | Comments and references                                                                                                                                                                                                                 | Centre    |
|------------------------------------------------------------------|---------------|-----------------------------------------------|--------------------|---------------------------------------|------------|-----------------------------------------------------------------------------------------------------------------------------------------------------------------------------------------------------------------------------------------|-----------|
|                                                                  |               |                                               |                    |                                       |            | 1997;52:231-232                                                                                                                                                                                                                         |           |
| Liquid, standardized commercial extracts of appropriate material | Liquid        | Diluent of the commercially available extract | Use of a nebuliser | Commercial standardized concentration | 2 min each | <ul style="list-style-type: none"> <li>- allergen extracts by Bencard Allergi Gmbh</li> <li>- Stepwise increase of concentration, starting with 1/1,000, higher dilutions if strong degree of IgE sensitization and/or NSBHR</li> </ul> | IOMM/CIOM |

## LOW MOLECULAR WEIGHT AGENTS

|                                                                                                                                                                 |  |  |  |  |  |  |  |  |
|-----------------------------------------------------------------------------------------------------------------------------------------------------------------|--|--|--|--|--|--|--|--|
| <b>Diisocyanates</b>                                                                                                                                            |  |  |  |  |  |  |  |  |
| <b>Notes:</b>                                                                                                                                                   |  |  |  |  |  |  |  |  |
| - either diisocyanate-containing products or in-house solutions of pure diisocyanates may be used                                                               |  |  |  |  |  |  |  |  |
| - for some agents e.g. paint hardeners containing both hexamethylene diisocyanate(HDI) and HDI-prepolymers, the use of relevant workplace products is preferred |  |  |  |  |  |  |  |  |

| Physical form                                      | Control agent                | Method of delivery                                                                              | Approximate amount used | Duration                             | Approximate target concentration                                                                                  | Exposure monitoring                                                                   | Comments and references                                   | Centre |
|----------------------------------------------------|------------------------------|-------------------------------------------------------------------------------------------------|-------------------------|--------------------------------------|-------------------------------------------------------------------------------------------------------------------|---------------------------------------------------------------------------------------|-----------------------------------------------------------|--------|
| <b><i>Methylenediphenyl diisocyanate (MDI)</i></b> |                              |                                                                                                 |                         |                                      |                                                                                                                   |                                                                                       |                                                           |        |
| Liquid                                             | 1,5 ml toluene nebulised     | Nebulisation of an in-house MDI solution (in toluene) from a small glass jar with pressured air | 1,5 ml                  | 15 min                               | level I: 0.0035 mg/m <sup>3</sup> NCO (1/10 of the OEL)<br>level II: 0,010 mg/m <sup>3</sup> NCO (1/3 of the OEL) | Filter collection + analysis of NCO (isocyanate groups) in the air : ISO 16702 (2001) | Suojalehto H et al. Am J Ind Med. 2011 Dec;54(12): 906-10 | FIOH   |
| Liquid solution with olive oil                     | Solvent nebulised for 30 min | Heating to 120°C: mimicking the patients job- painting or spraying                              | 5-10ml                  | 1, 15, 30, 60 min                    |                                                                                                                   | NM                                                                                    |                                                           | NIOM   |
| Liquid                                             | Solvent                      | Nebulisation from glass jar (heated)                                                            | NA                      | 10 min<br>20 min<br>30 min<br>60 min | 15-20 ppb                                                                                                         | Continuously. measured by Honeywell SPM monitor                                       | Sastre et al. Chest 2003; 123:1276-1279.                  | FJDM   |
| Liquid                                             | Solvent nebulised            | Heating to 120°C                                                                                | 50 ml or adapted to     | 1, 4, 10, 15, 30,                    | ~10 ppb (below 20 ppb)                                                                                            | MDA 7100 monitor                                                                      | Vandenplas O, Malo JL. Eur Respir                         | CHUM   |



| Physical form  | Control agent                                  | Method of delivery                                                                                                                           | Approximate amount used                      | Duration                             | Approximate target concentration   | Exposure monitoring                            | Comments and references | Centre        |
|----------------|------------------------------------------------|----------------------------------------------------------------------------------------------------------------------------------------------|----------------------------------------------|--------------------------------------|------------------------------------|------------------------------------------------|-------------------------|---------------|
|                | for 30 min                                     |                                                                                                                                              | generate 10 and 15 ppb                       | 60 min                               |                                    |                                                | J. 1997;10:2612-29.     |               |
| Solid crystals | Solvent or if a 2-part system, the paint alone | Heating to 120 °C                                                                                                                            | <1g                                          | Up to 70 min (10+20+40)              | < 20ppb                            | Toxic gas detector                             |                         | BHH           |
| Liquid         | Non-hazardous liquid component                 | Mimicking work, eg. <ul style="list-style-type: none"> <li>Painting liquid onto surface</li> <li>Adding 2 components to make foam</li> </ul> | Variable, but enough to achieve up to 20 ppb | 30 –60 sec                           | 20 ppb max                         | MDI monitor (TLD-1 toxic gas detector)         |                         | RBHT          |
| Solid crystals | 120°C heated clean sand                        | Heating to 120 °C                                                                                                                            | 2 g                                          | 60 min                               | ~10 ppb (below 20 ppb)             | MDA 7100 monitor<br>Polymetron                 |                         | UNIPD         |
| Liquid         | Atmospheric (pure) air                         | Evaporation at 80°C                                                                                                                          | Variable, but enough to achieve up to 10 ppb | 10 min<br>20 min<br>30 min<br>60 min | 2.5 ppb<br>5 ppb<br>5 ppb<br>5 ppb | Continuously measured by Honeywell SPM monitor |                         | IOMM/<br>CIOM |
| Liquid         | Isobutylacetate                                | Evaporation at 60°C                                                                                                                          | Variable, but enough to achieve up to 10 ppb | 10 min<br>20 min<br>30 min<br>60 min | 2.5 ppb<br>5 ppb<br>5ppb<br>5 ppb  | Continuously measured by Honeywell SPM monitor |                         | FSM           |

| Physical form                                                                                      | Control agent                                  | Method of delivery                                                                      | Approximate amount used | Duration                             | Approximate target concentration        | Exposure monitoring                                                                   | Comments and references                  | Centre |
|----------------------------------------------------------------------------------------------------|------------------------------------------------|-----------------------------------------------------------------------------------------|-------------------------|--------------------------------------|-----------------------------------------|---------------------------------------------------------------------------------------|------------------------------------------|--------|
|                                                                                                    |                                                |                                                                                         |                         |                                      |                                         |                                                                                       |                                          |        |
| <b>Hexamethylene diisocyanate (HDI) (usually in a paint or glue hardener or a related product)</b> |                                                |                                                                                         |                         |                                      |                                         |                                                                                       |                                          |        |
| Liquid                                                                                             | 2 ml butyl acetate nebulised                   | Nebulisation of HDI-containing paint hardener from a small glass jar with pressured air | 2 ml                    | 15 min                               | HDI monomers < 0.0035 mg/m <sup>3</sup> | Filter collection + analysis of NCO (isocyanate groups) in the air : ISO 16702 (2001) |                                          | FIOH   |
| Liquid solution with olive oil                                                                     | Paint without HDI component                    | Mimicking the patients job - painting onto cardboard or spraying (depending on work)    |                         | Up to 60 min                         | -                                       | NM                                                                                    |                                          | NIOM   |
| Liquid                                                                                             | Saline                                         | Nebulisation from nebuliser                                                             | 4 ml                    | 10 min<br>20 min<br>30 min<br>60 min | 15-20 ppb                               | Continuously measured by Honeywell SPM monitor                                        | Sastre et al. Chest 2003; 123:1276-1279. | FJDM   |
| Liquid                                                                                             | Solvent nebulised for 30 min                   | Diluted 1/10 in appropriate solvent and nebulised in the challenge room                 |                         | 1, 4, 10, 15, 30, 60 min             | ~10 ppb (below 20 ppb)                  | MDA 7100 monitor                                                                      |                                          | CHUM   |
| Liquid                                                                                             | Solvent or if a 2-part system, the paint alone | Painting onto cardboard or spraying depending on work exposure or levels achieved       |                         | Up to 70 min (10+20+40)              | < 20ppb                                 | Toxic gas detector                                                                    |                                          | BHH    |

| Physical form                            | Control agent               | Method of delivery                                                                | Approximate amount used                               | Duration                             | Approximate target concentration  | Exposure monitoring                                                                   | Comments and references                                                             | Centre        |
|------------------------------------------|-----------------------------|-----------------------------------------------------------------------------------|-------------------------------------------------------|--------------------------------------|-----------------------------------|---------------------------------------------------------------------------------------|-------------------------------------------------------------------------------------|---------------|
| Liquid                                   | Paint without HDI component | Mimicking work - Spray painting                                                   | Enough to achieve up to 20 ppb                        | 15 sec – 3 min                       | 20 ppb max                        | HDI monitor (model TLD-1 toxic gas detector)                                          |                                                                                     | RBHT          |
| Liquid                                   | Water at 80°C               | Evaporation at 80°C                                                               | 5 ml                                                  | 60 min                               | 10-20 ppb                         | MDA 7100 monitor<br>Polymetron<br>Sieger                                              |                                                                                     | UNIPD         |
| Liquid                                   | Atmospheric (pure) air      | Evaporation at 60°C                                                               | Variable, but enough to achieve up to 10 ppb          | 10 min<br>20 min<br>30 min<br>60 min | 2.5 ppb<br>5 ppb<br>5ppb<br>5 ppb | Continuously measured by Honeywell SPM monitor                                        | Solution of pure HDI                                                                | IOMM/<br>CIOM |
| Liquid                                   | Isobutylacetate             | Evaporation at 60°C                                                               | Variable, but enough to achieve a ppb of up to 10 ppb | 10 min<br>20 min<br>30 min<br>60 min | 2.5 ppb<br>5 ppb<br>5ppb<br>5 ppb | Continuously measured by Honeywell SPM monitor                                        |                                                                                     | FSM           |
| <b><i>Toluene diisocyanate (TDI)</i></b> |                             |                                                                                   |                                                       |                                      |                                   |                                                                                       |                                                                                     |               |
| Liquid                                   | 1 ml toluene (evaporation)  | Evaporation of in-house TDI solution (in toluene) from a small glass cup at 175°C | 1 ml                                                  | 15                                   | < 0.0035 mg/m <sup>3</sup>        | Filter collection + analysis of NCO (isocyanate groups) in the air : ISO 16702 (2001) | -Level 1 solution: 0.18 mg/ml in toluene<br>-Level 2 solution: 3.1 mg/ml in toluene | FIOH          |

| Physical form                  | Control agent                                  | Method of delivery                                                                                                   | Approximate amount used                                             | Duration                                             | Approximate target concentration | Exposure monitoring                                                                               | Comments and references                                                                                                 | Centre |
|--------------------------------|------------------------------------------------|----------------------------------------------------------------------------------------------------------------------|---------------------------------------------------------------------|------------------------------------------------------|----------------------------------|---------------------------------------------------------------------------------------------------|-------------------------------------------------------------------------------------------------------------------------|--------|
| Liquid solution with olive oil | Solvent or if a 2-part system, the paint alone | Mimicking the patients job - painting onto cardboard or spraying (depending on work)                                 |                                                                     | Up to 60 min                                         | -                                | NM                                                                                                |                                                                                                                         | NIOM   |
| Liquid                         | Water mixed with lactose                       | Nebulisation in a volumetric flask with pressured air. The flask contains 60 ml of TDI solution (SIGMA, Ref: T39853) | 60 ml. After the test it is possible to recover most of the product | 5 – 120 min                                          | level of TDI between 10 – 15 ppb | TDI concentration controlled by a MDA 7100monitor (MDA Scientific, Inc, Glenview, Illinois, USA). | Concentration is very temperature dependent. It is necessary to maintain the temperature of the chamber between 22-24°C | VHIR   |
| Liquid                         | Saline                                         | Nebulisation by an aerosol generator GENASIC°<br>The flask contains 1.5 ml (TDI, SIGMA)                              | ~ 0.1 mL                                                            | 1 min<br>2 min<br>4 min<br>8 min<br>15 min<br>30 min | 0 – 20 ppb                       | Continuously. measured by ppbRAE 3000 by RAE system monitor                                       | Based on our own and the Canadian experience                                                                            | SUH    |
| Liquid                         | Solvent nebulised for 30 min                   | Evaporation at room temperature in a glass flask + airflow                                                           |                                                                     | 1, 4, 10, 15, 30, 60 min                             | ~10 ppb (below 20 ppb)           | MDA 7100 monitor                                                                                  | Vandenplas O et al. Eur Respir J. 1999;13:1144-50.                                                                      | CHUM   |
| Liquid                         | Solvent or if a 2-part system, the paint alone | Painting onto cardboard or spraying depending on work exposure or levels                                             | Up to 20ppb                                                         | Up to 70 min (10+20+40)                              | < 20ppb                          | Toxic gas detector                                                                                |                                                                                                                         | BHH    |

| Physical form                                                                   | Control agent                 | Method of delivery                                                       | Approximate amount used                      | Duration                             | Approximate target concentration    | Exposure monitoring                                 | Comments and references | Centre        |
|---------------------------------------------------------------------------------|-------------------------------|--------------------------------------------------------------------------|----------------------------------------------|--------------------------------------|-------------------------------------|-----------------------------------------------------|-------------------------|---------------|
|                                                                                 |                               | achieved                                                                 |                                              |                                      |                                     |                                                     |                         |               |
| Liquid                                                                          | Water flushed with medical O2 | Evaporation of TDI liquid solution from a flask flushed with medical O2. | 20 ml                                        | 60 min                               | 10-20 ppb                           | Continuously. measured by Polymetron Sieger monitor |                         | UNIPD         |
| Liquid                                                                          | Atmospheric (pure) air        | Evaporation at 80°C                                                      | Variable, but enough to achieve up to 10 ppb | 10 min<br>20 min<br>30 min<br>60 min | 5 ppb<br>10 ppb<br>10 ppb<br>10 ppb | Continuously. measured by Honeywell SPM monitor     |                         | IOMM/<br>CIOM |
| Liquid                                                                          | Isobutylacetate               | Evaporation at 60°C                                                      | Variable, but enough to achieve up to 10 ppb | 10 min<br>20 min<br>30 min<br>60 min | 2.5 ppb<br>5 ppb<br>5ppb<br>5 ppb   | Continuously. measured by Honeywell SPM monitor     |                         | FSM           |
| <b>Other Isophorone diisocyanate (IPDI), 1,5-naphthalene diisocyanate (NDI)</b> |                               |                                                                          |                                              |                                      |                                     |                                                     |                         |               |
| Liquid                                                                          | Atmospheric (pure) air        | Evaporation of pure IPDI at 60°C                                         | Variable, but enough to achieve up to 10 ppb | 10 min<br>20 min<br>30 min<br>60 min | 2.5 ppb<br>5 ppb<br>5ppb<br>5 ppb   | Continuously. measured by Honeywell SPM monitor     |                         | IOMM/<br>CIOM |
| NDI Solid (Wax)                                                                 | Atmospheric (pure) air        | Evaporation of wax-like crystals of NDI at 120°C                         | Variable, but enough to achieve up to 10 ppb | 10 min<br>20 min<br>30 min<br>60 min | 2.5 ppb<br>5 ppb<br>5ppb<br>5 ppb   | Continuously. measured by Honeywell SPM monitor     |                         | IOMM/<br>CIOM |

**Other plastic chemicals: epoxy resins, acrylic resins, powder paints, acid anhydrides, etc.**

**Notes:**

- in resin systems containing solvents, the solvent alone may be used as the control agent
- many resin systems contain irritant ingredients
- on heating, PVC may release hydrochloric acid that is irritating to the airways
- cyanoacrylates polymerise with water vapour, monomer exposures are higher on less humid days
- with phthalic acid anhydrides care is needed if heated or nebulised; start with very short exposures

| Active agent           | Physical form             | Control agent                    | Method of delivery                          | Approximate amount used                    | Duration | Approximate target concentration | Exposure monitoring | Comments and references                                                                                         | Centre |
|------------------------|---------------------------|----------------------------------|---------------------------------------------|--------------------------------------------|----------|----------------------------------|---------------------|-----------------------------------------------------------------------------------------------------------------|--------|
| <b>Epoxy resins</b>    |                           |                                  |                                             |                                            |          |                                  |                     |                                                                                                                 |        |
| Epoxy paint + hardener | Liquid paint and hardener | 2 ml butylacetate (nebulisation) | Mixing the paint and the hardener in a bowl | Paint 100 ml + suitable amount of hardener | 30 min   | –                                | NM                  | The patient may also spread the mixture on a plate<br>Hannu T et al. Int Arch Allergy Immunol. 2009;148(1):41-4 | FIOH   |
| Epoxy paint + hardener | Liquid paint and hardener | Saline                           | Mixing the paint and the hardener in a bowl | Paint 100 ml + suitable amount of hardener | 30 min   | –                                | NM                  | The patient may also spread the mixture on a plate                                                              | NIOM   |

| Active agent                | Physical form            | Control agent                                                               | Method of delivery                                                                    | Approximate amount used           | Duration                                             | Approximate target concentration | Exposure monitoring | Comments and references      | Centre |
|-----------------------------|--------------------------|-----------------------------------------------------------------------------|---------------------------------------------------------------------------------------|-----------------------------------|------------------------------------------------------|----------------------------------|---------------------|------------------------------|--------|
|                             |                          |                                                                             |                                                                                       |                                   |                                                      |                                  |                     |                              |        |
| Epoxy resin paints or glues | Liquid                   | Non-hazardous paint, other workplace product e.g. cleaning agent            | Mimicking work – painting or spraying                                                 | Strength as used in the workplace | Up to 60 min                                         |                                  |                     |                              | NIOM   |
| Epoxy resins                | Solid form (lentil form) | Lactose                                                                     | The resin in solid form is placed in a container in a heated (80 - 90 °C) water bath. | 100 mg in a tray                  | 5-30 min or 20-60 min                                | –                                | NM                  | Gases are released with heat | VHIR   |
| Epoxy resins                | Liquid                   | Saline                                                                      | Liquid                                                                                | 50 to 100 ml                      | 1 min<br>2 min<br>4 min<br>8 min<br>15 min<br>30 min | –                                | NM                  |                              | SUH    |
| Epoxy resin paints or glues | Liquid                   | Other workplace product e.g. cleaning agent, body filler (styrene) or other | Painting or spraying                                                                  | As used in workplace              | Up to 70 min                                         | –                                | NM                  |                              | BHH    |

| Active agent                                                               | Physical form                         | Control agent                         | Method of delivery                                           | Approximate amount used                                | Duration          | Approximate target concentration | Exposure monitoring     | Comments and references                          | Centre |
|----------------------------------------------------------------------------|---------------------------------------|---------------------------------------|--------------------------------------------------------------|--------------------------------------------------------|-------------------|----------------------------------|-------------------------|--------------------------------------------------|--------|
| Epoxy resin paints                                                         | Liquid                                | Non-hazardous paint                   | Mimicking work – painting or spraying                        | Strength as used in the workplace                      | 15 sec– 2 min     | –                                | NM                      |                                                  | RBHT   |
| <b>Acrylic resins: acrylates, methacrylates and products based on them</b> |                                       |                                       |                                                              |                                                        |                   |                                  |                         |                                                  |        |
| Artificial nail (meth)acrylates                                            | Sculpturing gels, glues and nail tips | In-house control solution (nebulised) | Work mimicking preparing nails                               | Enough materials for 4 -6 nails or                     | 30-45 min         | –                                | VOC method: ISO 16000-6 | Sauni R et al. Am J Ind Med. 2008 51(12):968-74. | FIOH   |
| Prosthesis methacrylates                                                   | Powder + liquid                       | In-house control solution (nebulised) | Work mimicking: mixing prosthesis pMMA powder and MMA liquid | 5-10 ml liquid and suitable amount of powder           | 30 min            | –                                | VOC method: ISO 16000-6 |                                                  | FIOH   |
| Dental (meth)acrylates                                                     | Liquid                                | In-house control solution (nebulised) | Evaporation at room temperature                              | 2 x 10-20 drops of a dental adhesive (at 0 and 15 min) | 30 min            | –                                | VOC method: ISO 16000-6 | Lindström M et al. Allergy. 2002;57(6):543-5.    | FIOH   |
| Acrylates                                                                  | Liquid                                | Nebulised solvent                     | Mimicking the patients job                                   | As used in the patients workplace                      | Up to 60 min      | –                                | NM                      |                                                  | NIOM   |
| Acrylates                                                                  | Liquid                                | Nebulised solvent                     | Mimicking the patients job                                   | Strength as used in the                                | 1, 4, 10, 15, 30, | –                                | NM                      |                                                  | CHUM   |



| Active agent                                             | Physical form | Control agent                             | Method of delivery                                                                               | Approximate amount used                       | Duration            | Approximate target concentration | Exposure monitoring      | Comments and references                                                                                     | Centre |
|----------------------------------------------------------|---------------|-------------------------------------------|--------------------------------------------------------------------------------------------------|-----------------------------------------------|---------------------|----------------------------------|--------------------------|-------------------------------------------------------------------------------------------------------------|--------|
|                                                          |               |                                           |                                                                                                  | patients workplace                            | 60 min              |                                  |                          |                                                                                                             |        |
| Acrylates                                                | Liquid        | Nebulised solvent                         | Room temperature, mixing in an open vessel                                                       | Strength as used in the patients workplace    | 20 min<br>Up to 1 h |                                  | NM                       |                                                                                                             | FSM    |
| Methyl-methacrylate (MMA)                                | Liquid        | Latex gloves, cleaning agents             | Adding liquid to powder as performed in the workplace and sitting and breathing fumes afterwards | As workplace                                  | 1 –60 min           | –                                | NM                       | Lozewicz S et al. Occupational asthma due to methyl methacrylate and cyanoacrylates. Thorax 1985;40:836-839 | BHH    |
| Methyl-methacrylate (MMA)                                | Liquid        | Non-hazardous liquid component on its own | Adding 2 liquids together and breathing in fumes, mixing or stirring, as used in the workplace   | Strength as used in the patients workplace    | 1 – 5 min           | –                                | NM                       |                                                                                                             | RBHT   |
| <b>Cyanoacrylate: instant glues and related products</b> |               |                                           |                                                                                                  |                                               |                     |                                  |                          |                                                                                                             |        |
| Cyanoacrylate-based instant glue                         | Liquid glue   | In-house control solution (nebulised)     | Evaporation at room temperature or spreading glue on                                             | 3 x 3 drops of eye lash glue (at 0, 15 and 30 | 45 min              | <1 mg/m <sup>3</sup>             | VOC method: ISO 16000-6; | Lindström et al. Occup. Med, 2013                                                                           | FIOH   |

| Active agent                                                   | Physical form  | Control agent                         | Method of delivery                                                                | Approximate amount used           | Duration                                             | Approximate target concentration | Exposure monitoring                                                                                    | Comments and references                                                                                 | Centre |
|----------------------------------------------------------------|----------------|---------------------------------------|-----------------------------------------------------------------------------------|-----------------------------------|------------------------------------------------------|----------------------------------|--------------------------------------------------------------------------------------------------------|---------------------------------------------------------------------------------------------------------|--------|
|                                                                |                |                                       | a plate                                                                           | min) or 2-4 ml of industrial glue |                                                      |                                  |                                                                                                        |                                                                                                         |        |
| Cyanoacrylate-based instant glue                               | Liquid glue    | Nebulised solvent                     | Mimicking the patients job                                                        | As used in the patients workplace | Up to 60 min                                         | –                                | NM                                                                                                     |                                                                                                         | NIOM   |
| Cyanoacrylate                                                  | Glue           | Food gelatine                         | Mimicking the patients job                                                        | –                                 | 30 min                                               | –                                | –                                                                                                      | Andujar R et al. Am J Ind Med 2011; 54:714-8.                                                           | VHIR   |
| Cyanoacrylate-based instant glue                               | Glues and gels | Saline                                | Work mimicking= mixing liquid                                                     | 1-10 mL                           | 1 min<br>2 min<br>4 min<br>8 min<br>15 min<br>30 min | –                                | NM                                                                                                     |                                                                                                         | SUH    |
| Cyanoacrylate                                                  | Glue           | Isobutylacetate                       | Mimicking the patients job                                                        | –                                 | 30 min                                               | –                                | –                                                                                                      |                                                                                                         | FSM    |
| <b>Phthalic acid anhydrides</b>                                |                |                                       |                                                                                   |                                   |                                                      |                                  |                                                                                                        |                                                                                                         |        |
| Phthalic acid anhydrides (in epoxy resin hardeners or as such) | Liquid         | In-house control solution (nebulised) | Evaporation at room temperature and if negative, at 40-80 °C on the following day | 50 ml of hardener                 | 30 min                                               | < 0.035 mg/m <sup>3</sup>        | Collection into Tenax tubes, analysis according to Pfäffli et al. J Environ Monit. 2004 Apr;6(4):295-9 | -IgE-mediated allergy<br>- anhydrides evaporate easily upon heating, thus conc. is difficult to control | FIOH   |

| Active agent                                          | Physical form | Control agent                                          | Method of delivery                                                 | Approximate amount used        | Duration                 | Approximate target concentration | Exposure monitoring | Comments and references                                                                                          | Centre |
|-------------------------------------------------------|---------------|--------------------------------------------------------|--------------------------------------------------------------------|--------------------------------|--------------------------|----------------------------------|---------------------|------------------------------------------------------------------------------------------------------------------|--------|
| Tetrahydrophthalic anhydride                          | Powder        | Lactose                                                | Tipping 5% in lactose                                              |                                | 30 min                   | < 5 mg/m <sup>3</sup>            | PM (Dustrack®)      |                                                                                                                  | FJDM   |
| Acid anhydrides                                       | Pure (powder) | Lactose                                                | Tipping powder diluted 1/10 in lactose                             | ~200 g                         | 1, 4, 10, 15, 30, 60 min |                                  | NM                  |                                                                                                                  | CHUM   |
| Tetrahydrophthalic anhydride                          | Powder        | Lactose                                                | Evaporation                                                        | Up to 5 mg/m <sup>3</sup>      | 20 min                   | < 5 mg/m <sup>3</sup>            |                     |                                                                                                                  | FSM    |
| <b><i>Other/miscellaneous plastics and resins</i></b> |               |                                                        |                                                                    |                                |                          |                                  |                     |                                                                                                                  |        |
| Powder coatings (epoxy and/or polyester)              | Powder        | 50-100 ml lactose powder (dusting)                     | Heating with a soldering iron at 250°C                             | 50-100 ml                      | 30 min                   | –                                | PM                  |                                                                                                                  | FIOH   |
| Powder coatings, TGIC                                 | Powder        | Lactose powder tipped or other powder e.g. TGIC heated | Tipping or heating to 250°C using a boiling tube in a heated block | 5g heated, approx. 200g tipped | Up to 70 min             | –                                | PM                  | Anees W et al. Occupational asthma caused by heated triglycidyl isocyanurate Occupational Medicine 2011;61:65-67 | BHH    |
| Triglycidyl isocyanurate                              | Powder        | Lactose                                                | Tipping 4% in lactose                                              |                                | 30 min                   | < 5 mg/m <sup>3</sup>            | PM (Dustrack®)      | Sastre J et al. Int Arch Occup Environ Health. 2011;84(5):547-9.                                                 | FJDM   |

| Active agent                                        | Physical form                 | Control agent                         | Method of delivery                              | Approximate amount used                  | Duration                 | Approximate target concentration      | Exposure monitoring                                                      | Comments and references                                                               | Centre |
|-----------------------------------------------------|-------------------------------|---------------------------------------|-------------------------------------------------|------------------------------------------|--------------------------|---------------------------------------|--------------------------------------------------------------------------|---------------------------------------------------------------------------------------|--------|
|                                                     |                               |                                       |                                                 |                                          |                          |                                       |                                                                          |                                                                                       |        |
| Resins and paints (not based on isocyanates)        | Liquid or semi-solid          | Non-hardening part of the resin       | Mimicking work (painting or spraying)           | Same quantity as at work                 | 1, 4, 10, 15, 30, 60 min | –                                     | NM                                                                       |                                                                                       | CHUM   |
| Phthalate Ester (dioctyl phthalate)                 | Liquid                        | Isobutylacetate                       | Evaporation to boiling point                    | Variable but no more 5 mg/m <sup>3</sup> | Up to 30 min             |                                       | NM                                                                       | Dioctyl phthalate released in polyethylene extrusion process                          | FSM    |
| <b><i>Finished plastics</i></b>                     |                               |                                       |                                                 |                                          |                          |                                       |                                                                          |                                                                                       |        |
| Miscellaneous plastic materials (PE, PP, TPU, etc.) | Solid (sheets, pellets, etc.) | In-house control solution (nebulised) | Heating plastic with a soldering iron at ~250°C | 50-150 ml of plastic pellets or sheets   | 30 min                   | formaldehyde < 0.37 mg/m <sup>3</sup> | - Aldehydes: US Environmental protection agency EPA (1999); method TO11A | Formaldehyde release is often measured; Particle measurement possible but seldom done | FIOH   |

| Active agent               | Physical form                                 | Control agent                                         | Method of delivery                                                                            | Approximate amount used       | Duration                                       | Approximate target concentration | Exposure monitoring | Comments and references                                                                                               | Centre |
|----------------------------|-----------------------------------------------|-------------------------------------------------------|-----------------------------------------------------------------------------------------------|-------------------------------|------------------------------------------------|----------------------------------|---------------------|-----------------------------------------------------------------------------------------------------------------------|--------|
| Shrink wrap (plastic)      | Plastic film on a roll with heat seal machine | Using heat seal machine without plastic film          | Mimicking the patients job by using the heat seal machine                                     | Wrap as used in the workplace | Gradually increasing up to a maximum of 60 min | –                                | NM                  | Gannon PFG et al. Occupational asthma due to polyethylene shrink wrapping (paper wrapper's asthma) Thorax 1992;47:759 | RBHT   |
| Shrink wrap (plastic)      | Solid                                         | Cleaning agents or other agents used in the workplace | Up to 10 cm <sup>2</sup> heated in a boiling tube to temp used at work                        |                               | Up to 70 min                                   | –                                | NM                  |                                                                                                                       | BHH    |
| PVC; Vacuum packing        | Plastic bags                                  | Use of vacuum packaging machine without plastic bags  | Simulation of the working conditions in a provocation chamber with a vacuum packaging machine | –                             | 60-180 min                                     | –                                | NM                  | Muñoz X, et al. Arch Bronconeumol 2003;39(7):324-6                                                                    | VHIR   |
| PVC                        | Plastic drops                                 | Isobutylacetate                                       | Mimicking the patients job                                                                    | –                             | 60-120 min                                     | –                                | NM                  |                                                                                                                       | FSM    |
| Polyurethane mattress foam | Solid blocks of foam                          | A different type of foam                              | Cutting the form with an electric kitchen knife                                               | 1m x 0,5 m block              | 1,2,5,10, 30 up to 60                          | –                                |                     | Dust difficult to produce enough by cutting                                                                           | NMGH   |

## Metals and metal salts: welding fumes, nickel, cobalt, chromium, platinum, etc.

### Notes

- precious metal salts are very potent and very low doses should be used for SIC
- metal dusts and welding fumes are irritating to the airways

| Active agent                                            | Physical form                            | Control agent                       | Method of delivery                                                                                                                          | Approximate amount used                           | Duration   | Approximate target concentration                                                                       | Exposure monitoring                                                   | Comments and references                                                                                                                                                                                                      | Centre |
|---------------------------------------------------------|------------------------------------------|-------------------------------------|---------------------------------------------------------------------------------------------------------------------------------------------|---------------------------------------------------|------------|--------------------------------------------------------------------------------------------------------|-----------------------------------------------------------------------|------------------------------------------------------------------------------------------------------------------------------------------------------------------------------------------------------------------------------|--------|
| <b>Welding fumes</b>                                    |                                          |                                     |                                                                                                                                             |                                                   |            |                                                                                                        |                                                                       |                                                                                                                                                                                                                              |        |
| Welding fumes of stainless steel (containing Ni and Cr) | Welding plate + electrodes (solid metal) | Mild steel (welding 2,5 electrodes) | Welding                                                                                                                                     | 7,5 electrodes (4 mm diameter) or MIG/TIG welding | 30 min     | Particles: < 10 mg/m <sup>3</sup><br>Ni < 0,1 mg/m <sup>3</sup><br>Cr < 0,5 mg/m <sup>3</sup>          | Filter collection (CEN 481:1993) and gravimetric/metal analysis       | Hannu T et al. Eur Respir J. 2007 Jan;29(1):85-90.                                                                                                                                                                           | FIOH   |
| Welding fumes                                           | -                                        | Mild steel                          | Work mimicking: welding tasks similar to those carried out in the daily work but carried out within the maintenance service of the hospital | not measured                                      | 15-120 min | Environmental levels of Fe, Cd, Cu, Cr, Ni, NO <sub>2</sub> , NO, CO, and O <sub>3</sub> < Spanish TLV | Absorption spectrometry, adsorbent tubes and UV-VIS spectrophotometry | - Muñoz X, et al. Respiration 2009; 78(4):455-459<br>- Levels of Fe, Cd, Cu, Cr, Ni, NO <sub>2</sub> , NO, CO, and O <sub>3</sub> < Spanish TLV in a pre-test. The highest level was O <sub>3</sub> , 0.04 mg/m <sup>3</sup> | VHIR   |

| Active agent  | Physical form | Control agent                                                                                                          | Method of delivery                                                             | Approximate amount used | Duration       | Approximate target concentration                                                                             | Exposure monitoring | Comments and references                                                                   | Centre |
|---------------|---------------|------------------------------------------------------------------------------------------------------------------------|--------------------------------------------------------------------------------|-------------------------|----------------|--------------------------------------------------------------------------------------------------------------|---------------------|-------------------------------------------------------------------------------------------|--------|
|               |               |                                                                                                                        |                                                                                |                         |                |                                                                                                              |                     | (mean)                                                                                    |        |
| Welding fumes | Fumes         | Mild steel                                                                                                             | Work mimicking                                                                 | Work mimicking          | 30, 30, 60 min | 1, 4, 10, 15, 30 on the first day (risk of delayed reactions )<br>1, 4, 10, 15, 30, and 60 on the second day | NM                  | Vandenplas O, Thorax. 1995;50:587-8:<br>Vandenplas O et al. Eur Respir J. 1998;11:1182-4. | CHUM   |
| Welding fumes | Solid         | Nebulised metal solution e.g. potassium chloride or welding mild steel if other metals are more likely to be the issue | Patient brings in own metal from work and welds in our estates at the hospital | NM                      | Up to 120 min  |                                                                                                              | PM                  |                                                                                           | BHH    |

| Active agent             | Physical form           | Control agent                                  | Method of delivery                           | Approximate amount used                                  | Duration                                                                                        | Approximate target concentration | Exposure monitoring | Comments and references                                                                                        | Centre |
|--------------------------|-------------------------|------------------------------------------------|----------------------------------------------|----------------------------------------------------------|-------------------------------------------------------------------------------------------------|----------------------------------|---------------------|----------------------------------------------------------------------------------------------------------------|--------|
| <b>Nickel</b>            |                         |                                                |                                              |                                                          |                                                                                                 |                                  |                     |                                                                                                                |        |
| Nickel sulphate solution | Liquid                  | 1 ml/ 10 breaths of the commercial ALK diluent | Spira Elektro 2 dosimeter                    | 3 x 1 ml (0.1 - 1 - 10 mg/ml NiSO <sub>4</sub> in water) | 45 min                                                                                          | -                                | NM                  | Done with increasing doses upon 45 minutes                                                                     | FIOH   |
| Nickel                   | Nickel chloride, powder | Nebulised solvent                              | Nebulisation with a de Vilbiss 646 nebuliser | 0.1-10 mg/ml                                             | 1-5 min                                                                                         | -                                | NM                  | Inhalation for 1 min; if the FEV1 fall < 10%, another 2 min inhalation phases up to total 5 min                | NIOM   |
| Nickel chloride          | Powder                  | Saline                                         | Nebulisation with a de Vilbiss 646 nebulizer | Between 0.1 to 10 mg/ml                                  | Inhalation for 1 min; if the FEV1 fall < 10%, another 2 min inhalation phases up to total 5 min | -                                | NM                  | - Cruz MJ, et al. Arch Bronconeumol 2006; 42(6):305-9.<br><br>- Method: Bright P, et al. Thorax 1997; 52:28-32 | VHIR   |



| Active agent                      | Physical form   | Control agent                                  | Method of delivery                                                     | Approximate amount used                                  | Duration                            | Approximate target concentration | Exposure monitoring | Comments and references                                           | Centre |
|-----------------------------------|-----------------|------------------------------------------------|------------------------------------------------------------------------|----------------------------------------------------------|-------------------------------------|----------------------------------|---------------------|-------------------------------------------------------------------|--------|
| Nickel sulphate                   | Nickel sulphate | Saline                                         | Tidal volume method                                                    | 10 mg/ml                                                 | 2 min each concentration 1/1000-1/1 | -                                | NM                  | Fernandez et al. Int Arch Occup Environ Health. 2006;79(6):483-6. | FJDM   |
| Nickel chloride                   | Powder          | Normal saline                                  | Nebulisation with a de Vilbiss 646 nebulizer                           | Between 0.1 to 10 mg/ml                                  | 60 min                              | -                                | NM                  |                                                                   | UNIPD  |
| Nickel sulphate solution in water | Liquid          | Isobutyl acetate                               | Nebulisation in exposure chamber                                       | 2 ml 1% Nickel sulphate solution                         | 20 min                              | -                                | NM                  |                                                                   | FSM    |
| <b>Cobalt</b>                     |                 |                                                |                                                                        |                                                          |                                     |                                  |                     |                                                                   |        |
| Cobalt chloride solution          | Liquid          | 1 ml/ 10 breaths of the commercial ALK diluent | Spira Elektro 2 dosimeter                                              | 3 x 1 ml (0.1 - 1 - 10 mg/ml CoCl <sub>2</sub> in water) | 45 min                              | -                                | NM                  | Done with increasing doses upon 45 minutes                        | FIOH   |
| Cobalt                            | Powder          | Lactose powder, sieved and baked               | % Dust added to 250g lactose powder, then tipped repeatedly by patient | 1% to 5%                                                 | 20 min                              | -                                | NM                  |                                                                   | RBHT   |

| Active agent                            | Physical form | Control agent                                    | Method of delivery                                                               | Approximate amount used                                                              | Duration         | Approximate target concentration | Exposure monitoring | Comments and references                    | Centre |
|-----------------------------------------|---------------|--------------------------------------------------|----------------------------------------------------------------------------------|--------------------------------------------------------------------------------------|------------------|----------------------------------|---------------------|--------------------------------------------|--------|
| Cobalt chloride                         | Liquid        | Potassium Chloride or other metal salt nebulised | Nebulising it directly using a Turboneb II and maxineb 90 nebuliser pot and mask | ~20 ml total (10mg/ml CoCl <sub>2</sub> in saline)                                   | 35 min (5+10+20) | -                                | NM                  |                                            | BHH    |
| Cobalt (in tungsten carbide)            | Powder        | Mixture of lactose + charcoal powders            | Tipping pure hard metal dust                                                     |                                                                                      |                  | -                                |                     |                                            | CHUM   |
| Cobalt                                  | Powder        | Lactose powder                                   | Cobalt dust diluted in 250g lactose powder, then tipped repeatedly by patient    | 1% to 5%                                                                             | 60 min           | NA                               | NM                  |                                            | UNIPD  |
| Cobalt nitrate solution in water        | Liquid        | Isobutyl acetate                                 | Nebulisation in exposure chamber                                                 | 0.12 ml 1% solution                                                                  | 20 min           | -                                | NM                  |                                            | FSM    |
| <b>Chromium</b>                         |               |                                                  |                                                                                  |                                                                                      |                  |                                  |                     |                                            |        |
| Chromium: potassium dichromate solution | Liquid        | 1 ml/ 10 breaths of the commercial diluent       | Spira Elektro 2 dosimeter                                                        | 3 x 1 ml (0.1 - 1 - 10 mg/ml K <sub>2</sub> Cr <sub>2</sub> O <sub>7</sub> in water) | 45 min           | -                                | NM                  | Done with increasing doses over 45 minutes | FIOH   |

| Active agent                     | Physical form                         | Control agent                                    | Method of delivery                                                            | Approximate amount used                           | Duration                                                                                        | Approximate target concentration | Exposure monitoring | Comments and references                                                                                                             | Centre |
|----------------------------------|---------------------------------------|--------------------------------------------------|-------------------------------------------------------------------------------|---------------------------------------------------|-------------------------------------------------------------------------------------------------|----------------------------------|---------------------|-------------------------------------------------------------------------------------------------------------------------------------|--------|
| Chromium                         | Potassium dichromate solution, Liquid | Nebulised solvent                                | Nebulisation with a de Vilbiss 646 nebuliser                                  | 0.1-10 mg/ml                                      | 1-5 min                                                                                         | –                                | NM                  | Inhalation for 1 min; if the FEV1 fall < 10%, another 2 min inhalation phases up to total 5 min                                     | NIOM   |
| Chromium (Potassium dichromate). | Powder                                | Saline                                           | Nebulisation with a de Vilbiss 646 nebulizer                                  | Between 0.1 to 10 mg/ml                           | Inhalation for 1 min; if the FEV1 fall < 10%, another 2 min inhalation phases up to total 5 min | –                                | NM                  | -ref. Cruz MJ, et al. Arch Bronconeumol 2006; 42(6):305-9. -Based on the method described by Bright P, et al. Thorax 1997; 52:28-32 | VHIR   |
| Chromium: potassium dichromate   | Liquid                                | Potassium Chloride or other metal salt nebulised | Nebulising directly using a Turboneb II and maxineb 90 nebuliser pot and mask | ~20 ml total (2mg/ml K2Cr2O7 dissolved in saline) | 35 min(5+10+20)                                                                                 | –                                | NM                  | Bright P et al. Occupational asthma due to chrome and nickel electroplating Thorax 1997;52:28-32                                    | BHH    |

| Active agent                                     | Physical form | Control agent                    | Method of delivery                                                               | Approximate amount used                                  | Duration         | Approximate target concentration | Exposure monitoring | Comments and references                                         | Centre |
|--------------------------------------------------|---------------|----------------------------------|----------------------------------------------------------------------------------|----------------------------------------------------------|------------------|----------------------------------|---------------------|-----------------------------------------------------------------|--------|
| Chromium: potassium dichromate<br>Water solution | Liquid        | Isobutyl acetate                 | Nebulising it directly                                                           | (0,01% in 10 ml of water)<br>10 ml total                 | 20 min           |                                  |                     |                                                                 | FSM    |
| <b>Other</b>                                     |               |                                  |                                                                                  |                                                          |                  |                                  |                     |                                                                 |        |
| Platinum salts                                   | Powder        | Lactose powder, sieved and baked | Tipped repeatedly by the patient                                                 | 0.00004% to 0.0004% dust in 250 g lactose powder         | 20 min           | –                                | NM                  | potent                                                          | RBHT   |
| Palladium, Iridium                               | Powder        | Lactose powder, sieved and baked | Tipping repeatedly by the patient                                                | 0.0002% to 0.002% dust in 250 g lactose powder           | 20 min           | –                                | NM                  | potent                                                          | RBHT   |
| Zinc Sulphate                                    | Liquid        | Other metal salt nebulised       | Nebulising it directly using a Turboneb II and maxineb 90 nebuliser pot and mask | ~20 ml total (up to 10mg/ml ZnSO <sub>4</sub> in saline) | 35 min (5+10+20) |                                  | NM                  |                                                                 | BHH    |
| Aluminium chloride                               | Liquid        | Potassium chloride 10mg/ml       | Direct nebulisation                                                              | 10mg/ml                                                  | 3 minutes        | No                               | NM                  | Burge PS et al. Occupational asthma caused by aluminium Allergy | BHH    |

| Active agent | Physical form             | Control agent     | Method of delivery                           | Approximate amount used | Duration | Approximate target concentration | Exposure monitoring | Comments and references                                                                         | Centre |
|--------------|---------------------------|-------------------|----------------------------------------------|-------------------------|----------|----------------------------------|---------------------|-------------------------------------------------------------------------------------------------|--------|
|              |                           |                   |                                              |                         |          |                                  |                     | 2000;555:779-800                                                                                |        |
| Vanadium     | Liquid (Water solutions ) | Nebulised solvent | Nebulisation with a de Vilbiss 646 nebuliser | 0.1-10 mg/ml            | 1-5 min  | –                                | NM                  | Inhalation for 1 min; if the FEV1 fall < 10%, another 2 min inhalation phases up to total 5 min | NIOM   |

**Other chemicals in metal and electronics industry: metalworking fluids (MWF), soldering fluxes, etc.**

**Notes:**

- used MWF's may contain unknown, microbiological impurities

| Active agent                            | Physical form | Control agent                         | Method of delivery                                                                                       | Approximate amount used                                            | Duration          | Comments and references                                                                                                                                                                                                                                                                             | Centre |
|-----------------------------------------|---------------|---------------------------------------|----------------------------------------------------------------------------------------------------------|--------------------------------------------------------------------|-------------------|-----------------------------------------------------------------------------------------------------------------------------------------------------------------------------------------------------------------------------------------------------------------------------------------------------|--------|
| <b><i>Metalworking fluids (MWF)</i></b> |               |                                       |                                                                                                          |                                                                    |                   |                                                                                                                                                                                                                                                                                                     |        |
| MWF, unused                             | Liquid        | In-house control solution (nebulised) | Nebulisation of ~40°C unused MWF from a small glass jar with pressured air                               | 3 x 1,5 ml (5% MWF in water) at 0 min, 10 min and 20 min           | 30 min            | - The target concentrations of EA's and formaldehyde are about 1/10 of the Finnish OEL's<br>-EA: Henriks-Eckerman et al. Ann, Occup. Hyg 2007<br>- Formaldehyde: US Environmental protection agency EPA (1999); method TO11A<br>- Hannu et al. Int Arch Occup Environ Health. 2013 Feb;86(2):189-97 | FIOH   |
| MWF, unused                             | Liquid        | Nebulised theatre smoke               | Nebulising into room, then patient sits in room surrounded by mist (not nebulised onto patient directly) | Strength as used in the workplace – enough to cause a visible mist | Up to 10 min      |                                                                                                                                                                                                                                                                                                     | RBHT   |
| Used MWF                                | Liquid        | Solvent                               | Nebulised                                                                                                | 200 ml                                                             | 1, 4, 10, 15, 30, |                                                                                                                                                                                                                                                                                                     | CHUM   |

| Active agent                               | Physical form | Control agent                         | Method of delivery                                                           | Approximate amount used                                     | Duration          | Comments and references                                                                                                              | Centre |
|--------------------------------------------|---------------|---------------------------------------|------------------------------------------------------------------------------|-------------------------------------------------------------|-------------------|--------------------------------------------------------------------------------------------------------------------------------------|--------|
|                                            |               |                                       |                                                                              |                                                             | 60 min            |                                                                                                                                      |        |
| Used MWF                                   | Liquid        | Unused MWF with the same procedure    | Nebulising in the breathing zone using a Turboneb II and pari-pot nebuliser  | ~20 ml total (up to 8% MWF in water, as used in workplace ) | 70 min (10+20+40) | Robertson AS et al. Occupational asthma due to oil mists. Thorax 1988;43:200-205                                                     | BHH    |
| Ethanolamines (in MWF) or unused MWF       | Liquids       | Olive oil                             | Heating in glass jar                                                         | 15 ml                                                       | 30 min            | -Air concentration < 1 mg/m <sup>3</sup> , monitored by (Dustrack®)<br>-Sastre et al. J Invest Allergol Clin Immunol 2013 (in press) | FJDM   |
| <b>Soldering materials &amp; colophony</b> |               |                                       |                                                                              |                                                             |                   |                                                                                                                                      |        |
| Soldering/colophony fumes                  | Solid         | In-house control solution (nebulised) | Soldering with colophony containing wire and/or flux onto a circuit board    | 30 min                                                      | -                 |                                                                                                                                      | FIOH   |
| Colophony, solder                          | Solid         | Non-colophony solder wire             | Mimicking the patients job-heating and breathing vapours of melting solution |                                                             | Up to 30 min      |                                                                                                                                      | NIOM   |
| Colophony                                  | Solid         | Saline                                | Mimicking the patients job                                                   |                                                             | 1-30 min          |                                                                                                                                      | SUH    |

| Active agent                                                               | Physical form                  | Control agent                           | Method of delivery                                                                           | Approximate amount used                                                                    | Duration     | Comments and references                                                                                                                                                                                                                                                                                                                                                                                                                                       | Centre |
|----------------------------------------------------------------------------|--------------------------------|-----------------------------------------|----------------------------------------------------------------------------------------------|--------------------------------------------------------------------------------------------|--------------|---------------------------------------------------------------------------------------------------------------------------------------------------------------------------------------------------------------------------------------------------------------------------------------------------------------------------------------------------------------------------------------------------------------------------------------------------------------|--------|
| Colophony                                                                  | Solid                          | Non-colophony solder wire               | Mimicking the patients job by melting the multicore solder with a soldering iron             | 1 inspiration initially, then gradually increasing up to the maximum exposure if necessary | Up to 10 min |                                                                                                                                                                                                                                                                                                                                                                                                                                                               | RBHT   |
| Colophony or non-colophony solder fluxes (dodecanedioic acid, adipic acid) | Solid or liquids if flux alone | Non-colophony fluxed wire or vice versa | Melting with a soldering iron ~300°C or dipping in the flux every 1-2 min                    | Up to 6 metres of wire                                                                     | Up to 70 min | <ul style="list-style-type: none"> <li>- Burge PS et al. Bronchial provocation studies in workers exposed to the fumes of electronic soldering fluxes. <i>Clinical Allergy</i> 1980;10: 137-149</li> <li>- Moore VC et al. Occupational asthma caused by dodecanedioic acid. <i>Allergy</i> 2009;64:1099-1100</li> <li>- Moore VC et al. Occupational asthma to solder wire containing an adipic acid flux <i>Eur Respir J.</i> 2010 ;36 : 962-963</li> </ul> | BHH    |
| Soldering/ colophony fumes                                                 | Solid                          | Soldering with wire without colophony   | Soldering with colophony containing wire and/or flux onto a circuit board, or pure colophony | NA                                                                                         | 30-60 min    |                                                                                                                                                                                                                                                                                                                                                                                                                                                               | UNIPD  |
| Colophony                                                                  | Solid                          | Heated ethanol                          | Direct heating                                                                               | 770 mg                                                                                     | 20 min       |                                                                                                                                                                                                                                                                                                                                                                                                                                                               | FSM    |



| Active agent | Physical form | Control agent | Method of delivery | Approximate amount used | Duration | Comments and references | Centre |
|--------------|---------------|---------------|--------------------|-------------------------|----------|-------------------------|--------|
|              |               |               |                    |                         |          |                         |        |

## Hairdressing chemicals

### Notes:

- hair colour oxidants may irritate the airways

| Physical form                                          | Control agent                                       | Method of delivery                                                                                              | Approximate amount used                                  | Duration                 | Comments and references                                                                                                                            | Centre |
|--------------------------------------------------------|-----------------------------------------------------|-----------------------------------------------------------------------------------------------------------------|----------------------------------------------------------|--------------------------|----------------------------------------------------------------------------------------------------------------------------------------------------|--------|
| <b><i>Bleaching agents containing persulphates</i></b> |                                                     |                                                                                                                 |                                                          |                          |                                                                                                                                                    |        |
| Powder + liquid                                        | 50-100 ml lactose powder or oxidant alone (dusting) | Mixing                                                                                                          | 3 doses of bleaching powder + suitable amount of oxidant | 30 min                   | Liquid oxidant usually ~9% hydrogen peroxide                                                                                                       | FIOH   |
| Powder +liquid                                         | Water, saline or phosphate buffered saline solution | Mixing and tipping the mixture from one tray to another ~ 30 cm from the face                                   | 30 g bleaching powder + 30 ml oxidant                    | Up to 60 min             |                                                                                                                                                    | NIOM   |
| Powder                                                 | Lactose powder                                      | Mixing persulphate salt with 150 g lactose, tipping the mixture from one tray to another at 30 cm from the face | Between 5 – 30 g                                         | 5 - 60 min               | -Muñoz X, et al. Occup Environ Med 2004;61:861-6<br>-The estimated concentration of this substance in the air is between 1 and 6 mg/m <sup>3</sup> | VHIR   |
| Powder +liquid                                         | Water                                               | The persulphate salt (30 g) is mixed with oxidant (30 ml) by the patient and applied on a wig                   |                                                          | 2 - 20 min               |                                                                                                                                                    | SUH    |
| Powder                                                 | Lactose powder                                      | Tipping powder                                                                                                  | 200g                                                     | 1, 4, 10, 15, 30, 60 min |                                                                                                                                                    | CHUM   |

| Physical form                                           | Control agent                                          | Method of delivery                                                     | Approximate amount used                        | Duration        | Comments and references                                                                  | Centre |
|---------------------------------------------------------|--------------------------------------------------------|------------------------------------------------------------------------|------------------------------------------------|-----------------|------------------------------------------------------------------------------------------|--------|
| Powder                                                  | 50-100 g. lactose powder (dusting)                     | Tipping persulphate powder diluted in lactose                          | 0.1%, 1%, 10% persulphate in lactose powder    | 60 min          | Alternative method: Persulphate mixed with liquid oxidant, usually ~9% hydrogen peroxide | UNIPD  |
| Powder plus liquid                                      | Lactose plus peroxide oxidant mixed                    | Mixing                                                                 | As used in workplace                           | Up to 70 min    |                                                                                          | BHH    |
| Powder                                                  | Lactose powder, sieved and baked                       | % dust added to 250g lactose powder, then tipped repeatedly by patient | 0.1%                                           | 5 min to 20 min |                                                                                          | RBHT   |
| Liquid                                                  | Ethanol                                                | Nebulisation                                                           | 8 mg of ammonium persulphate in 3 ml water     | 30 min          | Approximate target concentration 1,1 mg/m <sup>3</sup>                                   | FSM    |
| <b>Other hair dyes: oxidated dark and red hair dyes</b> |                                                        |                                                                        |                                                |                 |                                                                                          |        |
| Liquid + liquid                                         | Oxidant alone or in-house control solution (nebulised) | Mixing                                                                 | 80 ml of hair dye + suitable amount of oxidant | 30 min          | Liquid oxidant usually ~9% hydrogen peroxide                                             | FIOH   |
| Liquid + liquid                                         | Water, saline or phosphate buffered saline solution    | Mixing                                                                 | 80 ml of hair dye + suitable amount of oxidant | Up to 60 min    |                                                                                          | NIOM   |
| Liquid                                                  | Water                                                  | Mixing                                                                 |                                                | 2 - 20 min      |                                                                                          | SUH    |
| <b>Perm wave solutions</b>                              |                                                        |                                                                        |                                                |                 |                                                                                          |        |
| Liquid                                                  | In-house control solution                              | Evaporation at room temperature                                        | 60-80 ml                                       | 30 min          | May be heated to ~40°C                                                                   | FIOH   |

| <b>Physical form</b> | <b>Control agent</b>                                | <b>Method of delivery</b> | <b>Approximate amount used</b> | <b>Duration</b> | <b>Comments and references</b> | <b>Centre</b> |
|----------------------|-----------------------------------------------------|---------------------------|--------------------------------|-----------------|--------------------------------|---------------|
|                      | (nebulised)                                         |                           |                                |                 |                                |               |
| Liquid               | Water, saline or phosphate buffered saline solution | Painted onto cardboard    | As used at work                | Up to 60 min    |                                | NIOM          |
| Liquid               | Other workplace products painted                    | Painted onto cardboard    | As used at work                | Up to 70 min    |                                | BHH           |

## Antimicrobials, disinfectants and detergents

### Notes:

- the irritancy of a cleaning agent is largely dependent on its pH

| Physical form       | Control agent                         | Method of delivery                                                                             | Approximate amount used                       | Duration                 | Comments and references                                                                                                                                | Centre |
|---------------------|---------------------------------------|------------------------------------------------------------------------------------------------|-----------------------------------------------|--------------------------|--------------------------------------------------------------------------------------------------------------------------------------------------------|--------|
| <b>Formaldehyde</b> |                                       |                                                                                                |                                               |                          |                                                                                                                                                        |        |
| Powder              | In-house control solution (nebulised) | Heating up paraformaldehyde powder in a 65 °C oil-bath                                         | 2.5 g                                         | 15 min                   | - target conc. < 0.37 mg/m <sup>3</sup><br>- monitoring: formaldehyde and other aldehydes: US Environmental protection agency EPA (1999); method TO11A | FIOH   |
| Liquid              | Water, saline or PBS                  | Standing in room while breathing in substance in open tray at RT or mixing substance in a bowl | Strength as used in the workplace (50-100 ml) | Up to 60 min             |                                                                                                                                                        | NIOM   |
| Liquid              | Solvent                               | Evaporation at RT                                                                              | 200 ml                                        | 1, 4, 10, 15, 30, 60 min | Vandenplas O et al. Persistent asthma following accidental exposure to formaldehyde. Allergy. 2004;59:115-6.                                           | CHUM   |
| Liquid              | Cleaning agent painted onto cardboard | Painting onto cardboard                                                                        | 100 ml 10% solution                           | Up to 70 minutes         | Burge PS et al. Occupational asthma due to formaldehyde. Thorax 1985;40: 255-260                                                                       | BHH    |
| Liquid              | Water                                 | Standing in room while breathing in substance in open tray                                     | Strength as used in the workplace             | 5 – 15 minutes           |                                                                                                                                                        | RBHT   |
| Liquid              | Water                                 | Direct nebulisation                                                                            | 70 µl of formaldehyde 4% in 10 ml water       | Up to 1 h                |                                                                                                                                                        | FSM    |

| Physical form         | Control agent                         | Method of delivery                                                                             | Approximate amount used                           | Duration                 | Comments and references                                                                                                                  | Centre |
|-----------------------|---------------------------------------|------------------------------------------------------------------------------------------------|---------------------------------------------------|--------------------------|------------------------------------------------------------------------------------------------------------------------------------------|--------|
| <b>Glutaraldehyde</b> |                                       |                                                                                                |                                                   |                          |                                                                                                                                          |        |
| Liquid                | In-house control solution (nebulised) | Mixing at 40 °C                                                                                | 2-5 ml 25% glutaraldehyde solution + 500 ml water | 30 min                   | -Target conc. < 0,42 mg/m <sup>3</sup><br>-Formaldehyde and other aldehydes: US Environmental protection agency EPA (1999); method TO11A | FIOH   |
| Liquid                | Water, saline or PBS                  | Standing in room while breathing in substance in open tray at RT or mixing substance in a bowl | Strength as used in the workplace (50-100 ml)     | Up to 60 min             |                                                                                                                                          | NIOM   |
| Liquid                | Saline                                | Nebulisation in chamber from nebulizer (glutaraldehyde 2%)                                     |                                                   | 30 min                   | Quirce et al. Allergy 1999; 54; 1121-22                                                                                                  | FJDM   |
| Liquid                | Water                                 | Mixing at 25 °C                                                                                |                                                   | 1 - 30 min               |                                                                                                                                          | SUH    |
| Liquid                | Water with yellow food dye            | Standing in room while breathing in substance in open tray                                     | 2% as used in the workplace                       | 5 – 15 minutes           |                                                                                                                                          | RBHT   |
| Liquid                | Solvent                               | Evaporation at RT                                                                              | 200 ml                                            | 1, 4, 10, 15, 30, 60 min | Vandenplas O et al. Persistent asthma following accidental exposure to formaldehyde. Allergy. 2004;59:115-6.                             | CHUM   |
| Liquid                | Cleaning agent painted onto cardboard | Painting onto cardboard                                                                        | As used in workplace                              | Up to 70 min             | Gannon PFG et al. Occupational asthma due to glutaraldehyde and formaldehyde in endoscopy and X-ray departments Thorax; 1995;50:156-159  | BHH    |
| Liquid                | Ethanol                               | Nebulisation in chamber                                                                        | 0,2 ml 25% glutaraldehyde in 4,9 ml water         | Up to 30 min             |                                                                                                                                          | FSM    |

| Physical form                               | Control agent                                                 | Method of delivery                                       | Approximate amount used                                   | Duration         | Comments and references                                                                                                                   | Centre |
|---------------------------------------------|---------------------------------------------------------------|----------------------------------------------------------|-----------------------------------------------------------|------------------|-------------------------------------------------------------------------------------------------------------------------------------------|--------|
| <b>Glyoxal</b>                              |                                                               |                                                          |                                                           |                  |                                                                                                                                           |        |
| Liquid                                      | In-house control solution (nebulised)                         | Spraying                                                 | 3 x 1.2 ml 1 mg/ml Glyoxal solution (at 0, 15 and 30 min) | 30 - 45 min      | - Target conc. < 0,2 mg/m <sup>3</sup><br>- Formaldehyde and other aldehydes: US Environmental protection agency EPA (1999); method TO11A | FIOH   |
| Liquid                                      | Water, saline or PBS                                          | Spraying at RT or mixing substance in a bowl             | Strength as used in the workplace (50-100 ml)             | Up to 60 min     |                                                                                                                                           | NIOM   |
| <b>Chloramine T</b>                         |                                                               |                                                          |                                                           |                  |                                                                                                                                           |        |
| Liquid                                      | In-house control solution (nebulised)                         | Spreading on a plate                                     | 50-100 ml                                                 | 30 min           | Mäkelä R et al. Occup Med (Lond). 2011 Mar;61(2):121-6.                                                                                   | FIOH   |
| Liquid                                      | Water, saline or PBS                                          | Spreading on a plate at RT or mixing substance in a bowl | Strength as used in the workplace (50-100 ml)             | Up to 60 min     |                                                                                                                                           | NIOM   |
| Liquid                                      | In-house control solution (nebulised)                         | Nebulisation in chamber                                  | 5 ml 0,5% chloramine T solution                           | 30 min up to 1 h |                                                                                                                                           | FSM    |
| <b>Chloramines and nitrogen trichloride</b> |                                                               |                                                          |                                                           |                  |                                                                                                                                           |        |
| Vapour                                      | Chlorine c 0.5mg/m <sup>3</sup> from 1:20 sodium hypochlorite | Freshly generated nitrogen trichloride atmosphere        | Chamber levels 0.5mg/m <sup>3</sup>                       | Up to 30 minutes | Thickett KM et al. Occupational asthma caused by chloramines in indoor swimming-pool air Eur Respir J 2002;9:827-832                      | BHH    |

| Physical form                                                              | Control agent                                                                | Method of delivery                                                                     | Approximate amount used                                                                        | Duration                 | Comments and references                                                                                                         | Centre |
|----------------------------------------------------------------------------|------------------------------------------------------------------------------|----------------------------------------------------------------------------------------|------------------------------------------------------------------------------------------------|--------------------------|---------------------------------------------------------------------------------------------------------------------------------|--------|
| <b><i>Quaternary ammonium compounds</i></b>                                |                                                                              |                                                                                        |                                                                                                |                          |                                                                                                                                 |        |
| Liquid                                                                     | Solvent                                                                      | Nebulising commercial dilution of quaternary ammonium compounds "as used"              | 200 ml                                                                                         | 1, 4, 10, 15, 30, 60 min |                                                                                                                                 | CHUM   |
| <b><i>Other, various detergents, cleaning agents and preservatives</i></b> |                                                                              |                                                                                        |                                                                                                |                          |                                                                                                                                 |        |
| Liquid detergents                                                          | Water, saline or PBS                                                         | Mixing the detergent in a bowl at RT                                                   | Strength as used in the workplace (50-100 ml)                                                  | Up to 60 min             |                                                                                                                                 | NIOM   |
| Liquid detergents                                                          | Water with food coloring to simulate the color of detergent                  | Mixing the detergent in two vessels                                                    | 250 ml in a vessel                                                                             | 5 – 120 min              |                                                                                                                                 | VHIR   |
| Liquid detergents                                                          | Another similarly irritant cleaning product without the same active chemical | Spraying                                                                               | 1) 5 sprays<br>2) Up to 5 sprays, continuing with work simulation (wiping, rubbing as at work) | 1-5 minutes, up to 35    | Spraying by the hospital personnel beforehand, and taking the patient into the chamber, or if negative, spraying by the patient | NMGH   |
| Liquid detergent                                                           | Water, saline or PBS                                                         | Evaporating the substance in open tray at RT or mixing substance in a bowl or spraying | Strength as used in the workplace (50-100 ml)                                                  | Up to 60 min             |                                                                                                                                 | NIOM   |
| Liquid preservative: 4,4-                                                  | Other metal-working fluid constituents                                       | Nebulised to challenge chamber                                                         | 0.7%                                                                                           | Up to 50 min             | This is a biocide used in metal-working fluids                                                                                  | BHH    |



| Physical form           | Control agent | Method of delivery | Approximate amount used | Duration | Comments and references | Centre |
|-------------------------|---------------|--------------------|-------------------------|----------|-------------------------|--------|
| methylene-bismorpholine |               |                    |                         |          |                         |        |

### Pharmaceutical agents etc.

#### Notes:

- antibiotics may induce isolated late-phase reactions.

| Active agent                                                                            | Physical form         | Control agent                      | Method of delivery                                                                                               | Approximate amount used  | Duration                 | Comments and references                                                               | Centre |
|-----------------------------------------------------------------------------------------|-----------------------|------------------------------------|------------------------------------------------------------------------------------------------------------------|--------------------------|--------------------------|---------------------------------------------------------------------------------------|--------|
| Various solid pharmaceuticals                                                           | Tablets, powders etc. | 50-100 ml lactose powder (dusting) | Diluted usually < 10% in lactose powder and dusted with pressured air every 1 minute                             | ~100 ml lactose/drug mix | 30-45 min                | The challenge technique and dose depend on the level of sensitization, symptoms, etc. | FIOH   |
| Antibiotics<br>Erythromycin<br>Penicillin<br>Augmentin<br>Amoxicillin<br>Flucloxacillin | Powder                | Lactose powder, sieved and baked   | % Dust added to 250g lactose powder, then tipped repeatedly by patient                                           | 0.1% to 5%               | 20 minutes               |                                                                                       | RBHT   |
| Antibiotics                                                                             | Powder                | Lactose powder                     | Tipping powder diluted 1/10 in lactose                                                                           | 200 g                    | 1, 4, 10, 15, 30, 60 min |                                                                                       | CHUM   |
| Colistin or other pharmaceutical agents                                                 | Colistin, powder form | Lactose powder                     | One gram of colistin is mixed with 50 g lactose and the patient tipped the mixture from one tray to another at a | 1 gr                     | 15 min                   | - Ref. Gómez-Ollés S, et al. Chest 2010; 137 (5): 1200 – 2<br>-Based on the method    | VHIR   |

| Active agent                        | Physical form | Control agent         | Method of delivery                                       | Approximate amount used | Duration          | Comments and references                                                                                                              | Centre |
|-------------------------------------|---------------|-----------------------|----------------------------------------------------------|-------------------------|-------------------|--------------------------------------------------------------------------------------------------------------------------------------|--------|
|                                     |               |                       | distance of 30 cm from the face                          |                         |                   | described by Moscato G, et al. Eur Respir J 1995;8:467-9.                                                                            |        |
| Sodium alendronate                  | Solid         | Lactose powder        | Mimicking the patients job                               | 10 mg                   | 60 min            | G. Pala, L. Perfetti, I. Cappelli, M. Carminati, G. Moscato. Allergy Net; 2008; 1092                                                 | FSM    |
| Piperazine                          | Powder        | Lactose               | Close-circuit delivery machine                           |                         | Up to 30 min      | - Target concentration < 2 mg/m <sup>3</sup> , PM with Dustrack®<br>- Quirce et al. J Investig Allergol Clin Immunol 2006; 16: 138-9 | FJDM   |
| Denatonium benzoate (1% in ethanol) | Liquid        | Ethanol               | Painting and rubbing onto hands (wearing nitrile gloves) | 100 ml                  | 70 min (10+20+40) |                                                                                                                                      | BHH    |
| Sevoflurane and Isoflurane          | Gas           | Other anaesthetic gas | Gas from anaesthetic machine                             | 0.25-0.5% in air        | 15 breaths        | Vellore AD et al. Occupational asthma and allergy to sevoflurane and isoflurane in anaesthetic staff Allergy 2006;61:1485-6          | BHH    |
| Thiamine                            | Powder or     | Lactose (tipped) or   | tipped or nebulised                                      | 100g                    | 30 min            | Drought VI et al. Occupational asthma                                                                                                | BHH    |

| Active agent | Physical form | Control agent             | Method of delivery | Approximate amount used | Duration | Comments and references                                                                        | Centre |
|--------------|---------------|---------------------------|--------------------|-------------------------|----------|------------------------------------------------------------------------------------------------|--------|
|              | solution      | normal saline (nebulised) |                    |                         |          | induced by thiamine in a vitamin supplement for breakfast cereals<br>Allergy 2005;60:1213-1214 |        |
